# Supplementary material for: Host compounds based on the rigid 9,10-dihydro-9,10-ethanoanthracene framework: selectivity behaviour in mixed isomeric dichlorobenzenes
Source: Royal Society of Chemistry journal article supplement (doi:10.1039/d4ce00113c), 2024-01-01
Supplement: d4ce00113c1.pdf [file d4ce00113c1.pdf]

## Host compounds based on the rigid 9,10-dihydro-9,10-ethanoanthracene framework: selectivity behaviour in mixed isomeric dichlorobenzenes

Benita Barton,<sup>\*a</sup> Mino R. Caira,<sup>\*b</sup> Ulrich Senekal,<sup>a</sup> and Eric C Hosten<sup>a</sup>

<sup>a</sup>Department of Chemistry, PO Box 77000, Nelson Mandela University, Port Elizabeth, 6031, South Africa. E-mail: [benita.barton@mandela.ac.za](mailto:benita.barton@mandela.ac.za)

<sup>b</sup>Department of Chemistry, University of Cape Town, Rondebosch 7701, South Africa. E-mail: [mino.caira@uct.ac.za](mailto:mino.caira@uct.ac.za)

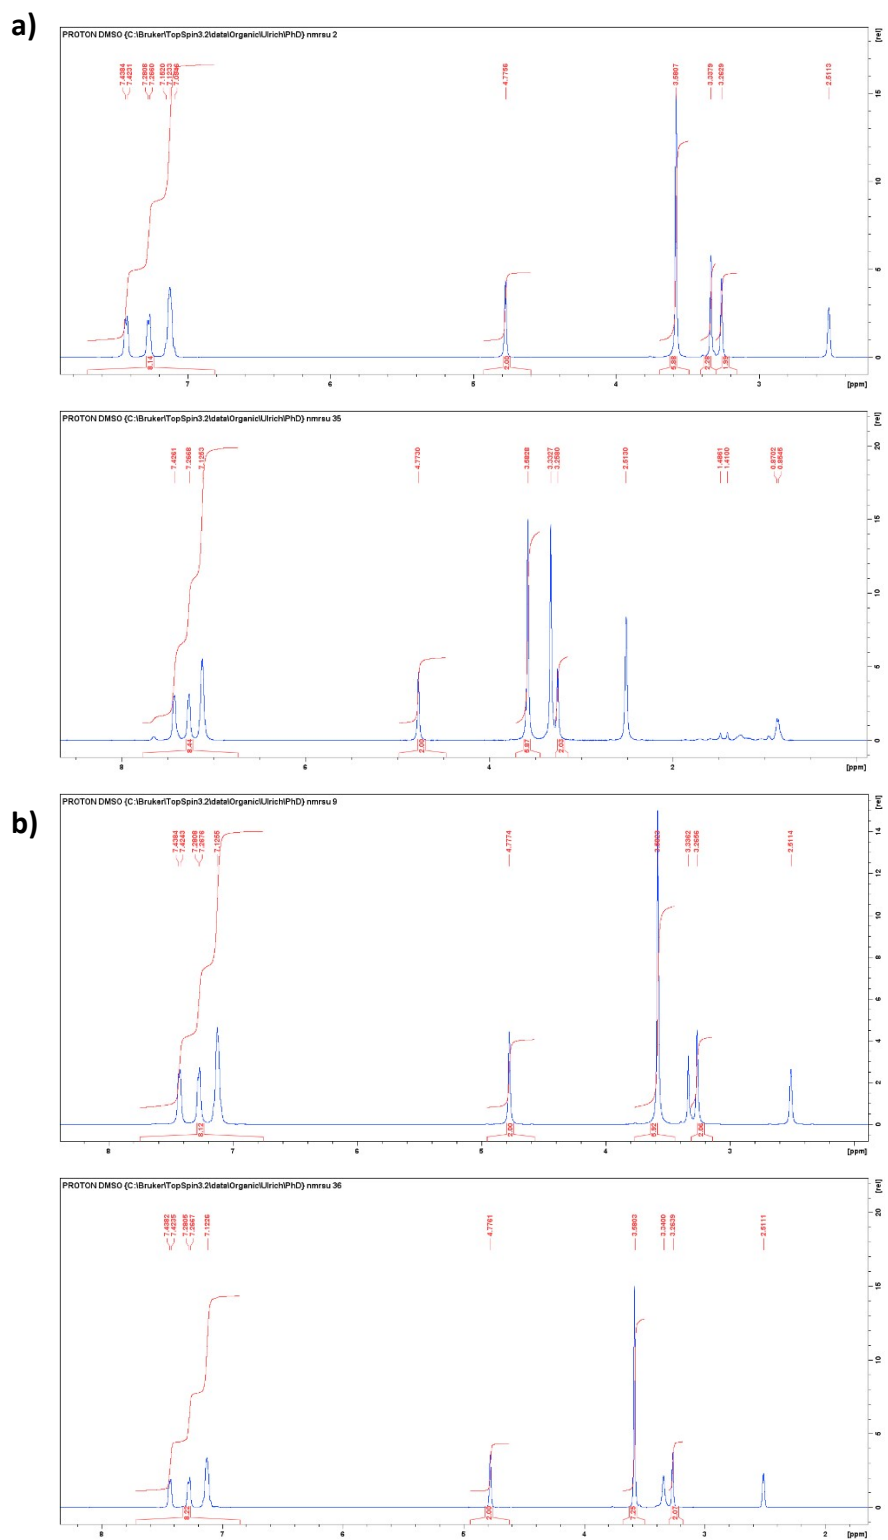

**Figure S1.  $^1\text{H}$ -NMR spectra of the duplicated single solvent experiments of *o*-DCB (a) and *m*-DCB (b) with H1**

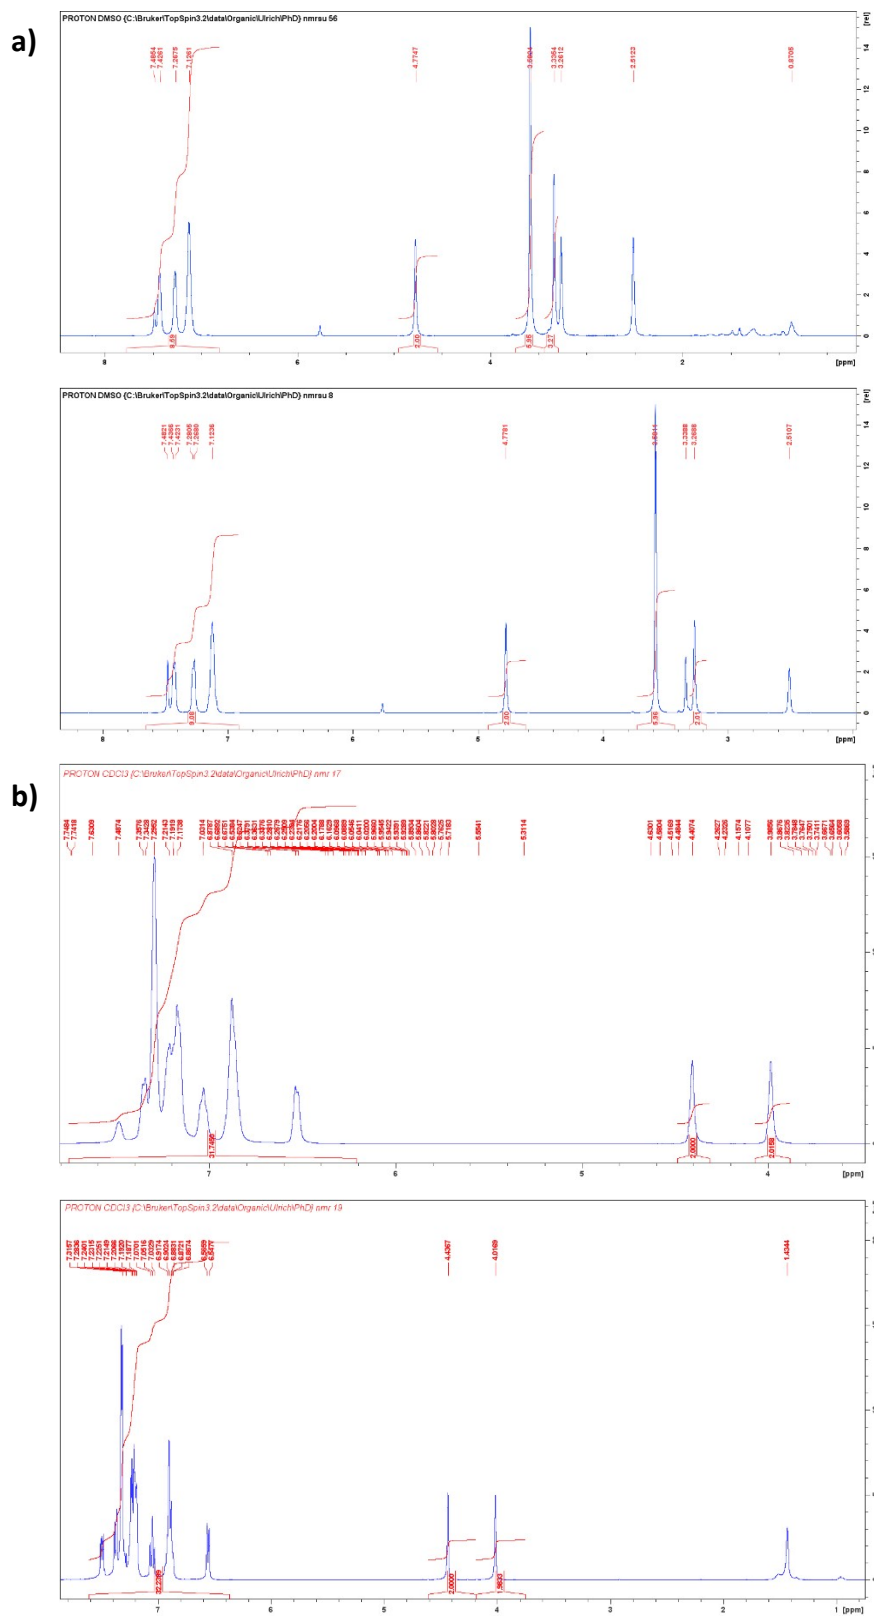

**Figure S2.**  $^1\text{H}$ -NMR spectra of the duplicated single solvent experiments of *p*-DCB (a) with H1 and *o*-DCB (b) with H2

a)

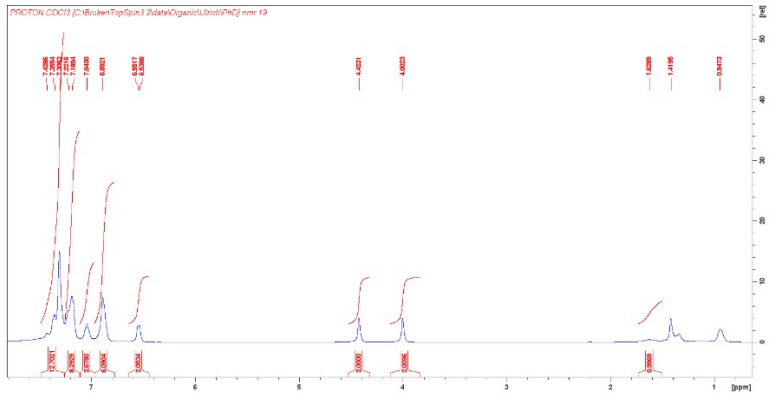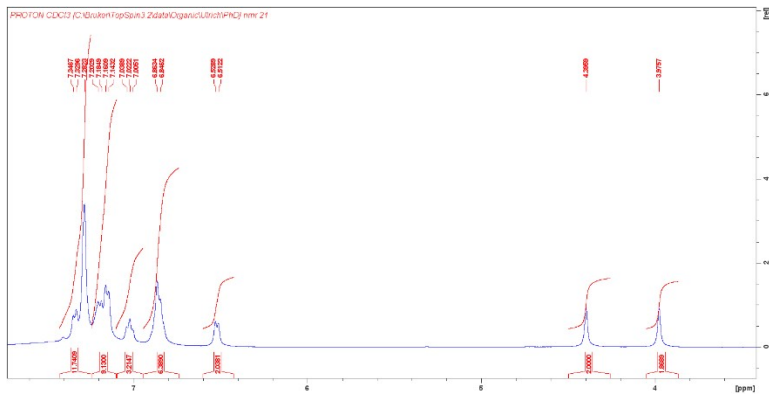

b)

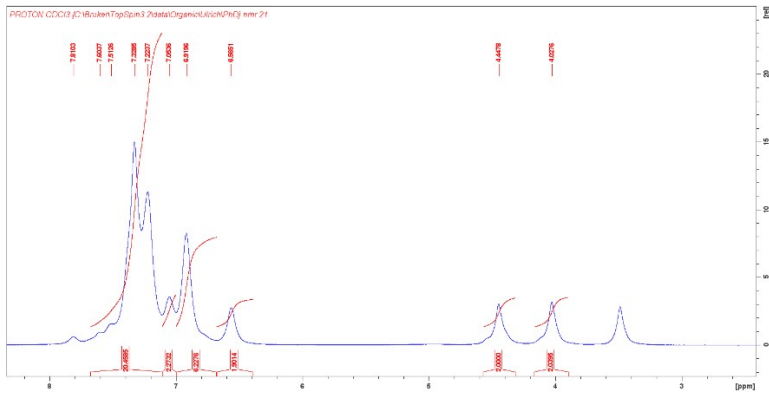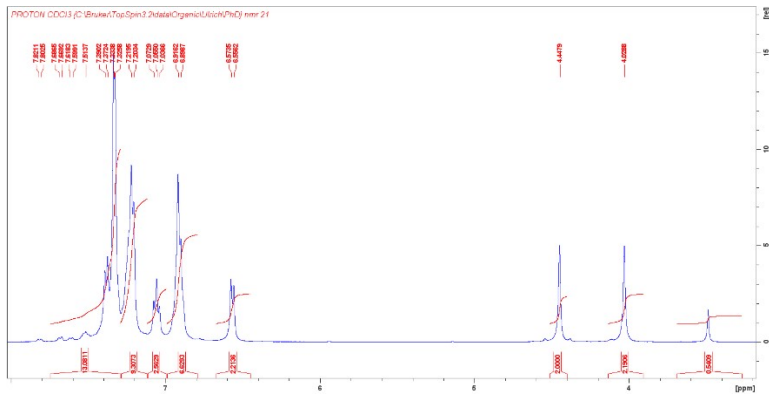

Figure S3.  $^1\text{H-NMR}$  spectra of the duplicated single solvent experiments of *m*-DCB (a) and *p*-DCB (b) with H<sub>2</sub>

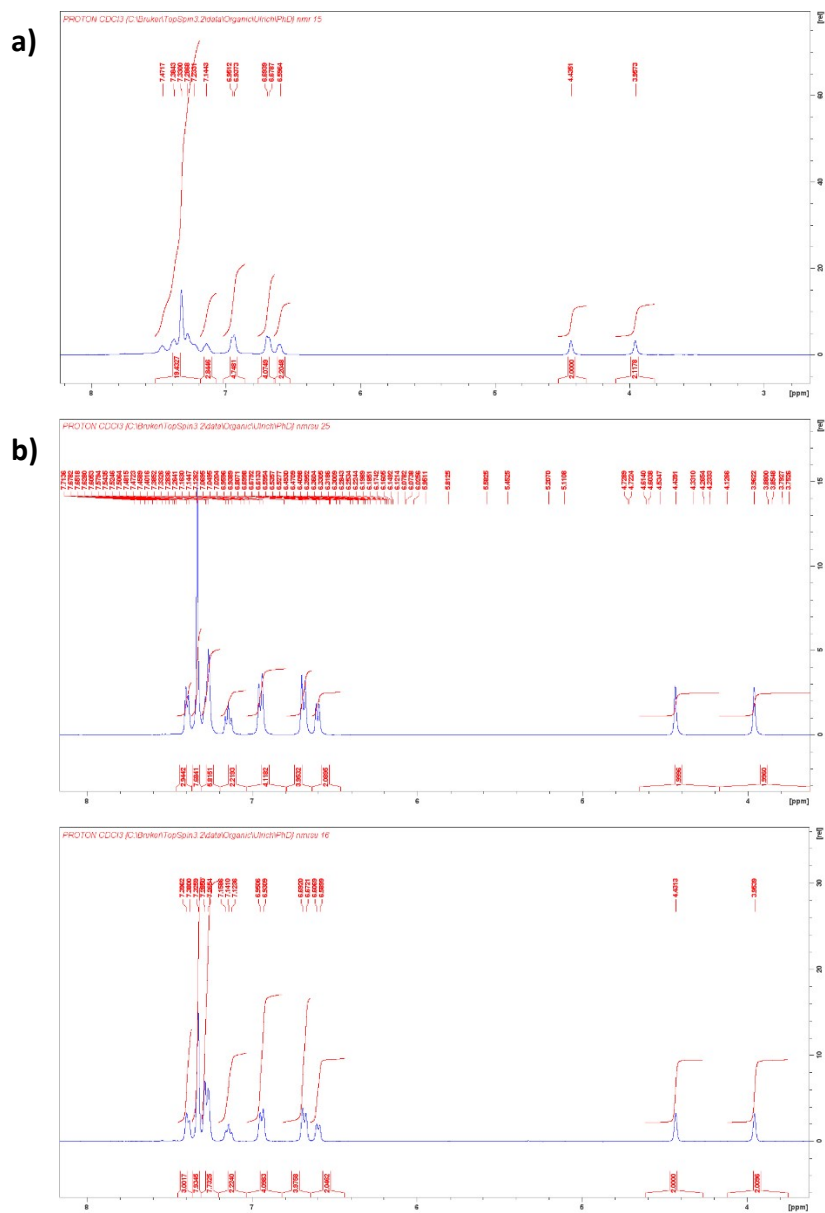

Figure S4.  $^1\text{H-NMR}$  spectra of the duplicated single solvent experiments of *o*-DCB (a) and *m*-DCB (b) with H3

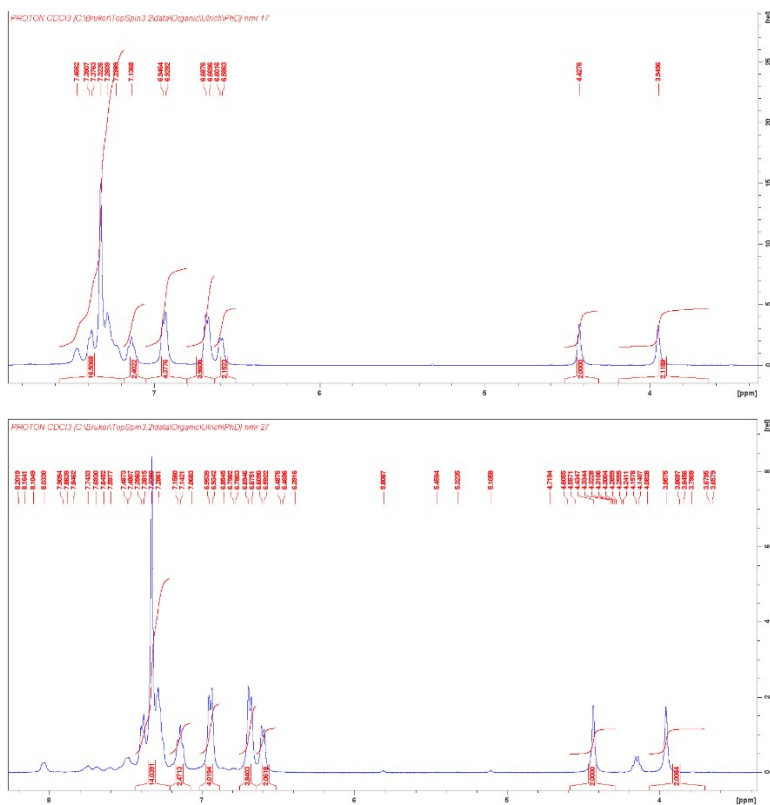

Figure S5.  $^1\text{H-NMR}$  spectra of the duplicated single solvent experiment of *p*-DCB with H3

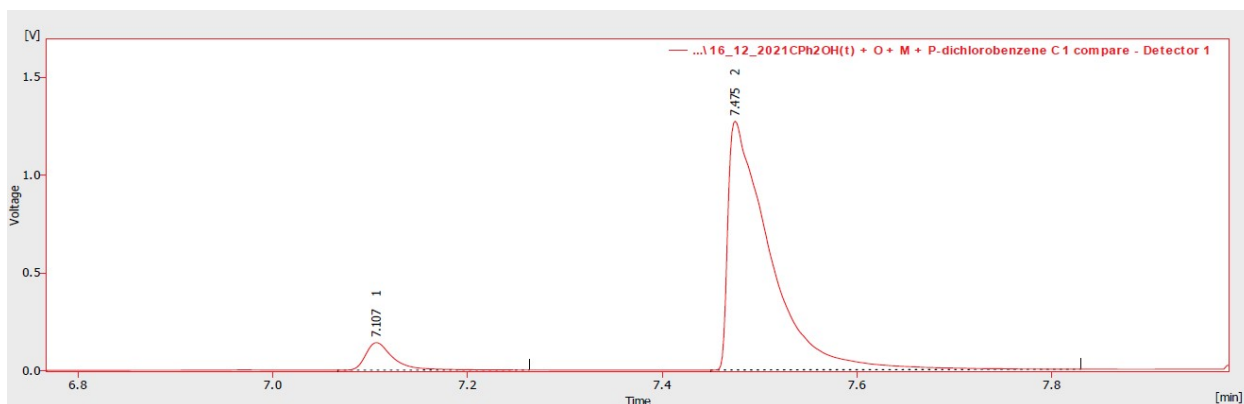

Figure S6. *o*-DCB/*m*-DCB/*p*-DCB ternary mixture of the three dichlorobenzene isomers; eluding in the order of *m*-DCB, *o*-DCB and *p*-DCB (the latter two peak overlapped)





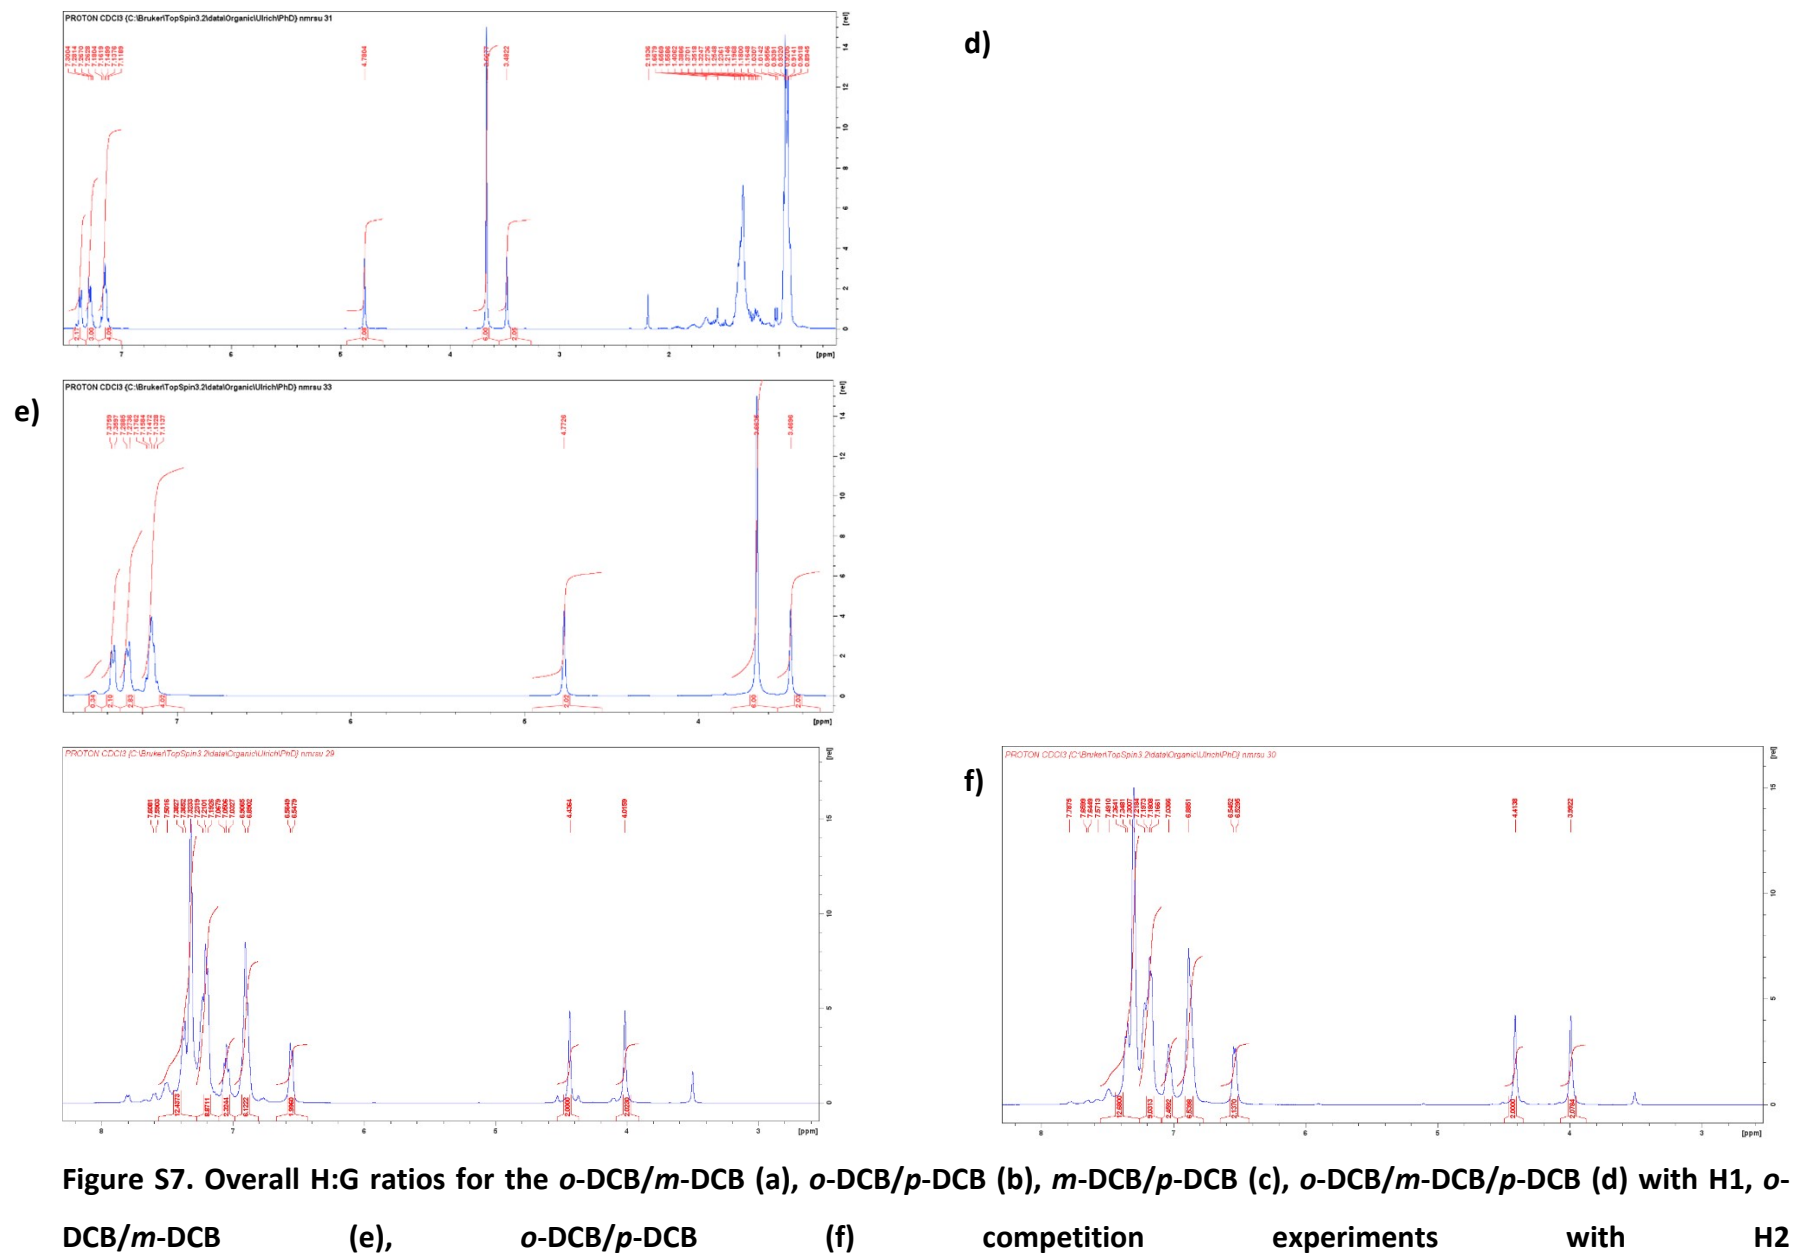

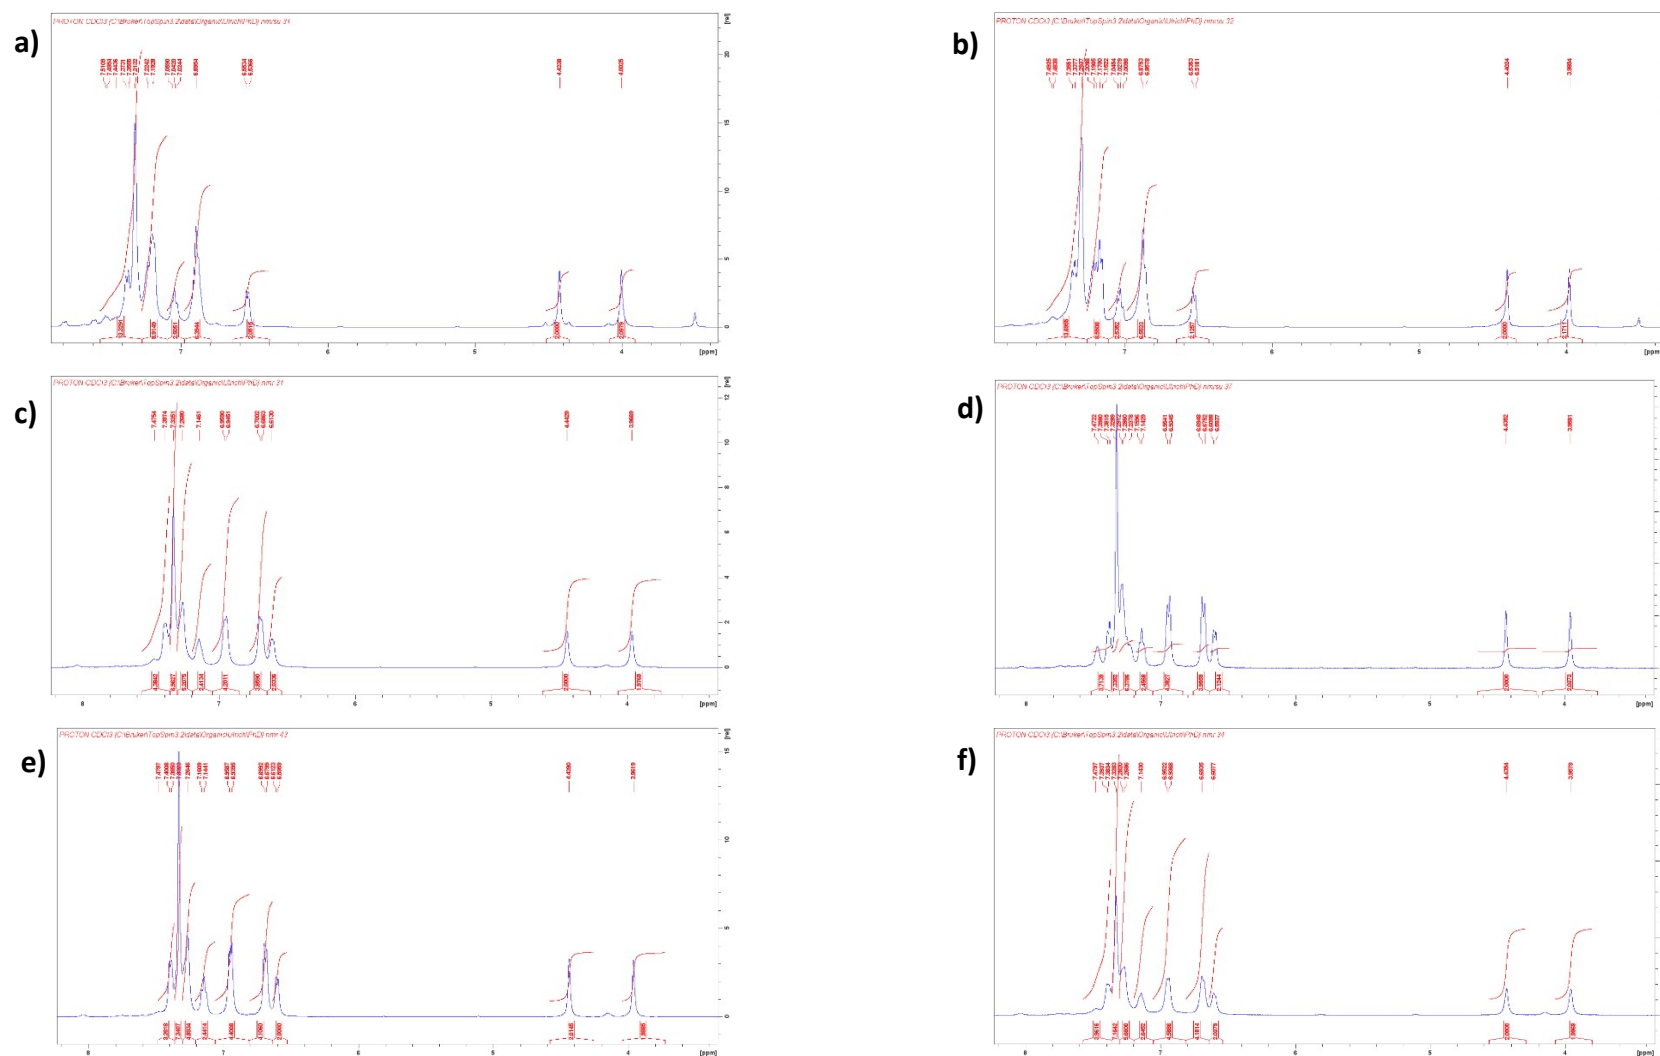

Figure S8. Overall H:G ratios for the  $m\text{-DCB}/p\text{-DCB}$  (a),  $o\text{-DCB}/m\text{-DCB}/p\text{-DCB}$  (b) with H2,  $o\text{-DCB}/m\text{-DCB}$  (c),  $o\text{-DCB}/p\text{-DCB}$  (d),  $m\text{-DCB}/p\text{-DCB}$  (e),  $o\text{-DCB}/m\text{-DCB}/p\text{-DCB}$  (f) competition experiments with H3

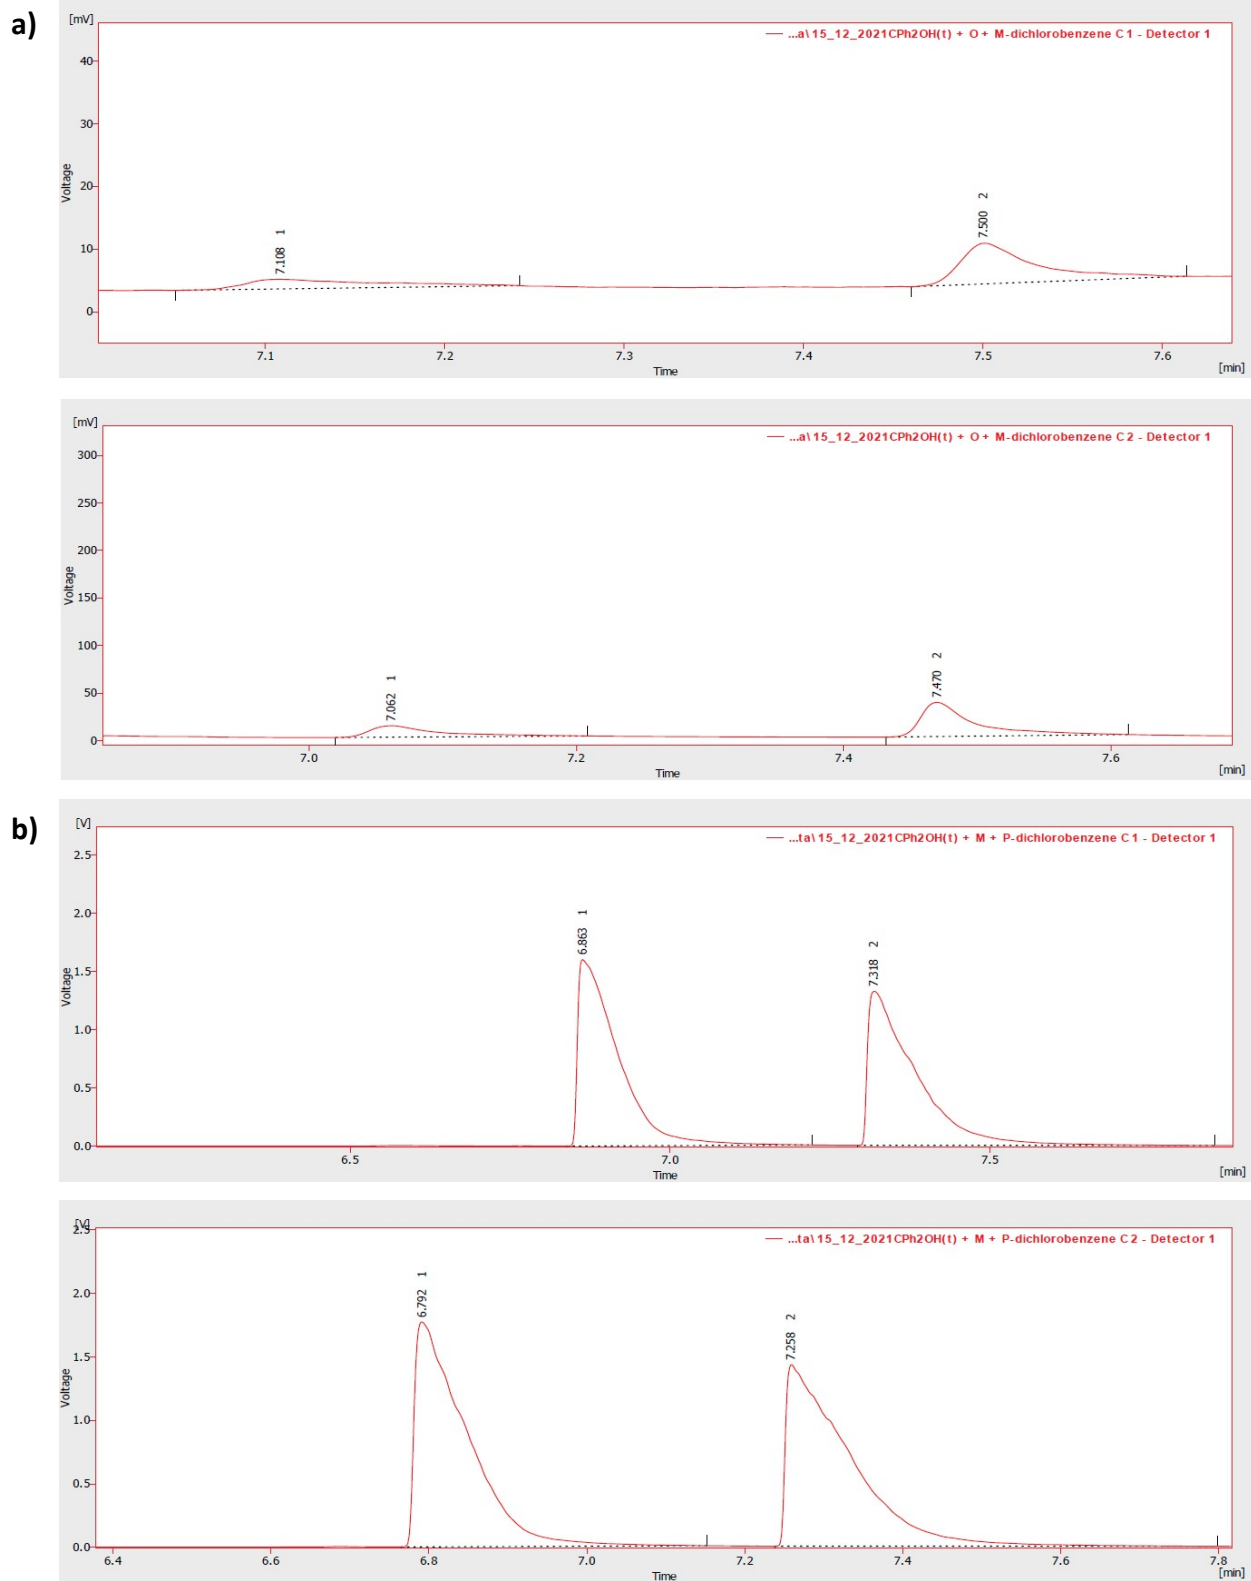

**Figure S9. GC-FID chromatograms of the *o*-DCB/*m*-DCB (a) and *m*-DCB/*p*-DCB (b) binary guest mixtures with H2**

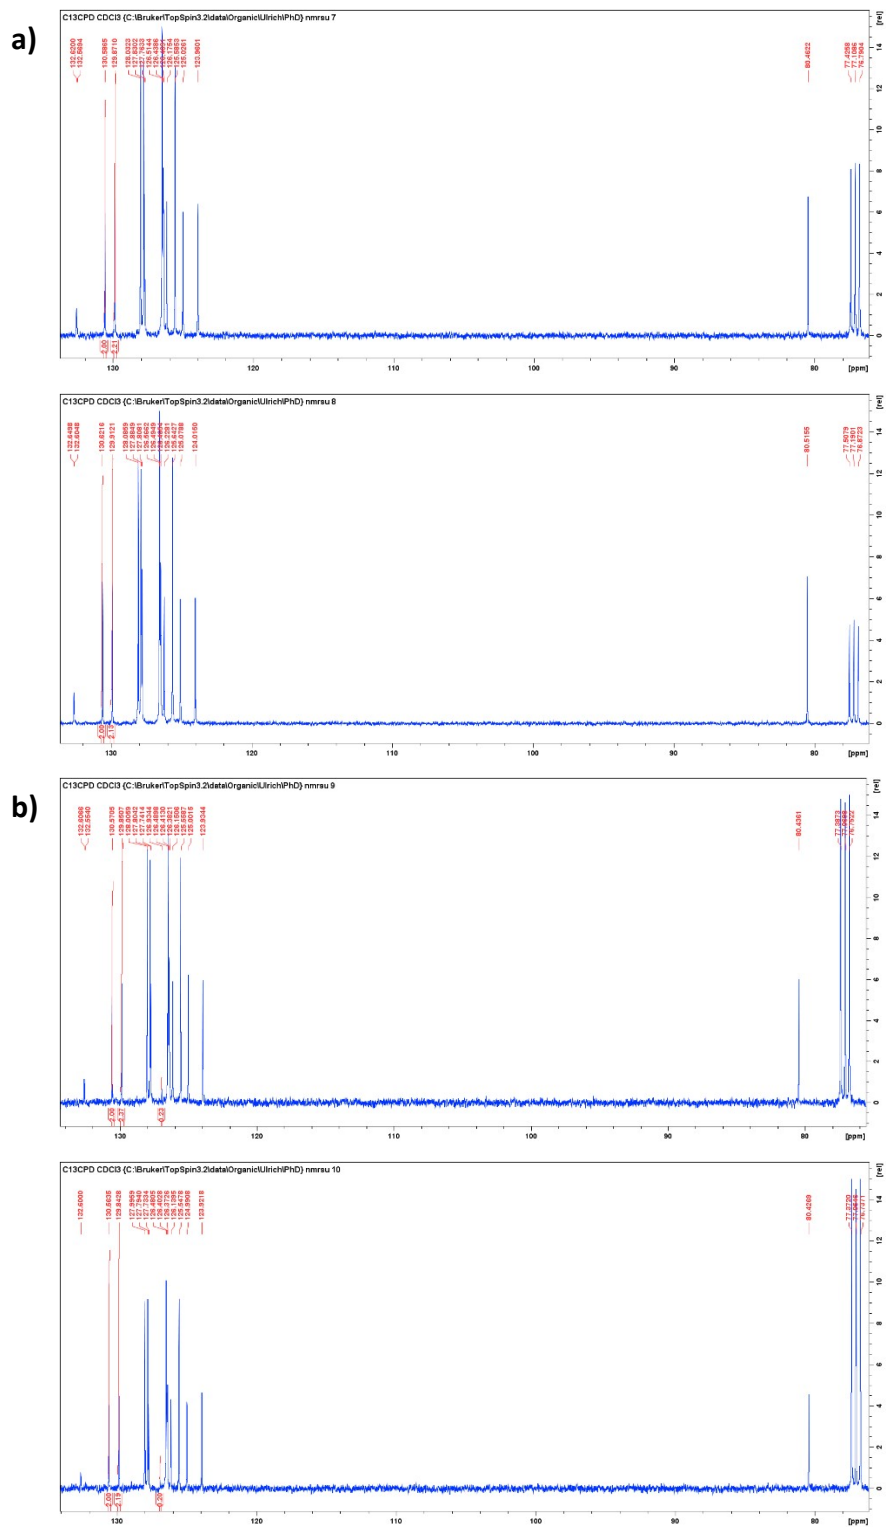

Figure S10.  $^{13}\text{C}$ -NMR spectra of the *o*-DCB/*p*-DCB (a) binary and *o*-DCB/*m*-DCB/*p*-DCB ternary mixtures with H2

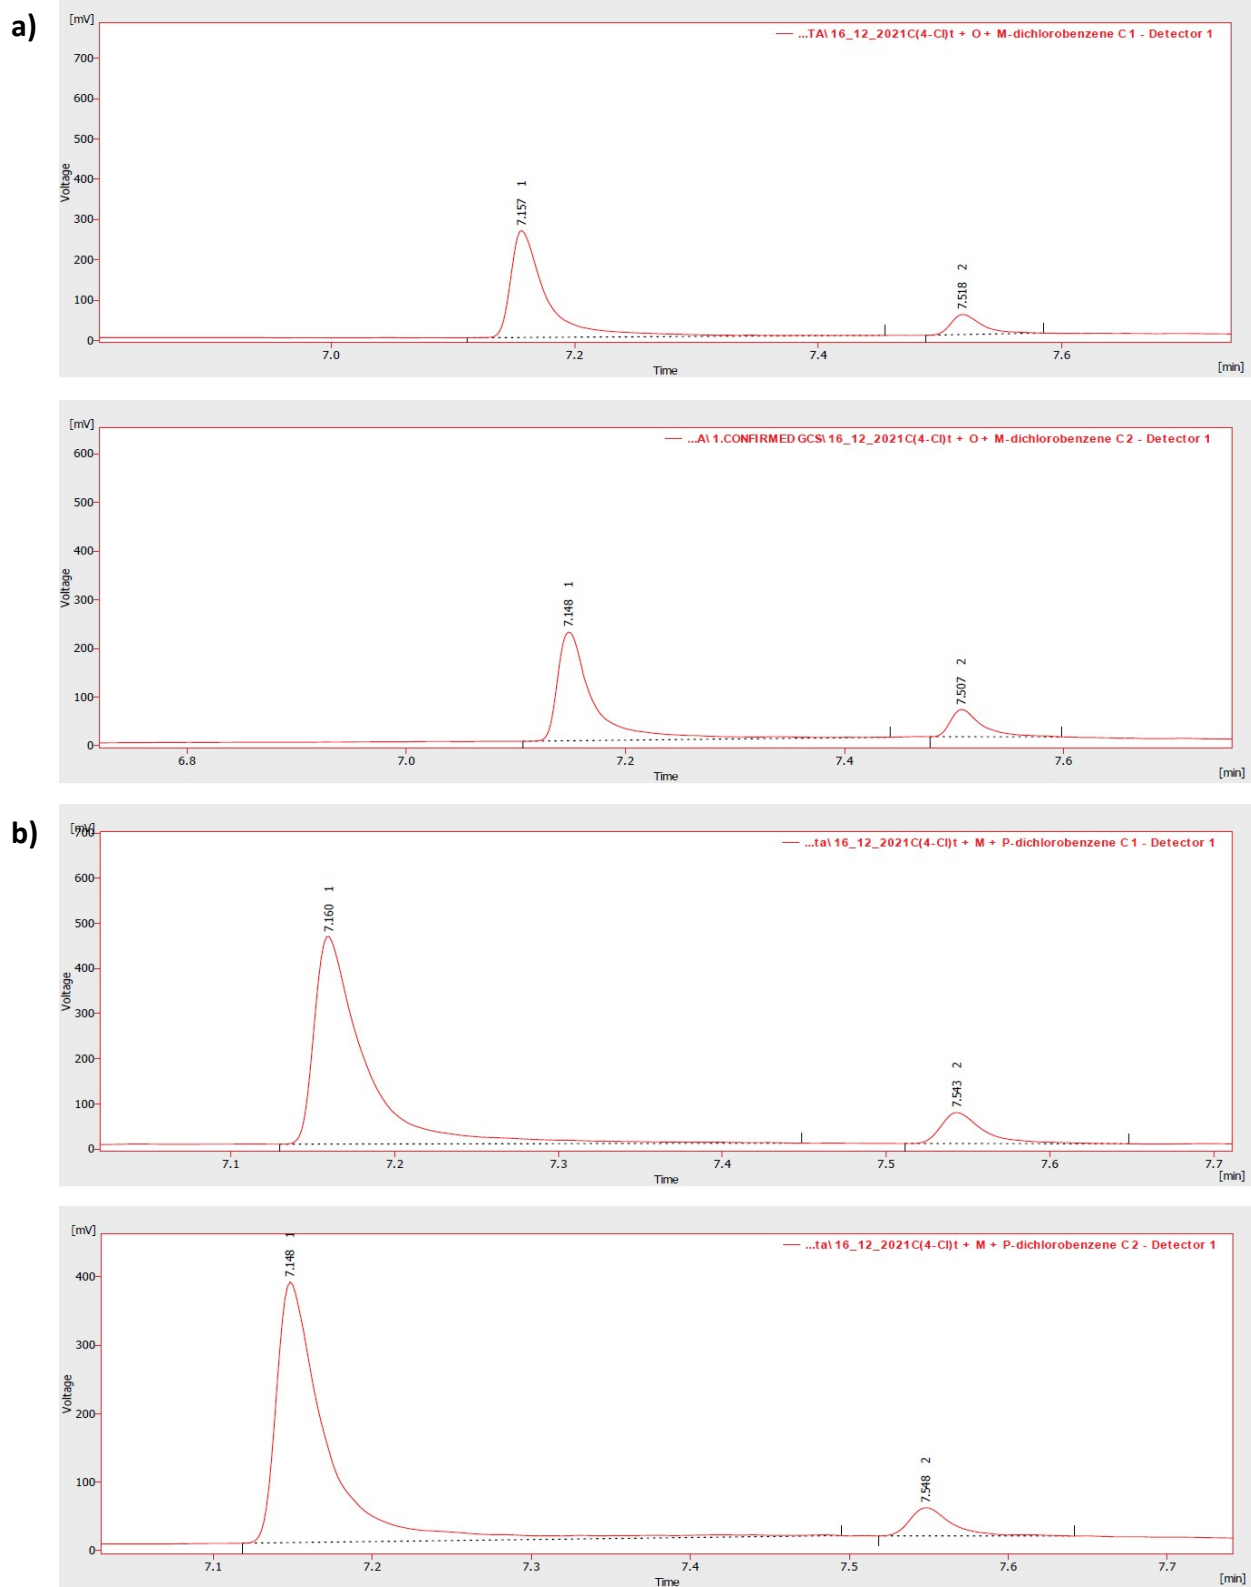

**Figure S11. GC-FID chromatograms of the *o*-DCB/*m*-DCB (a) and *m*-DCB/*p*-DCB (b) binary guest mixtures with H3**

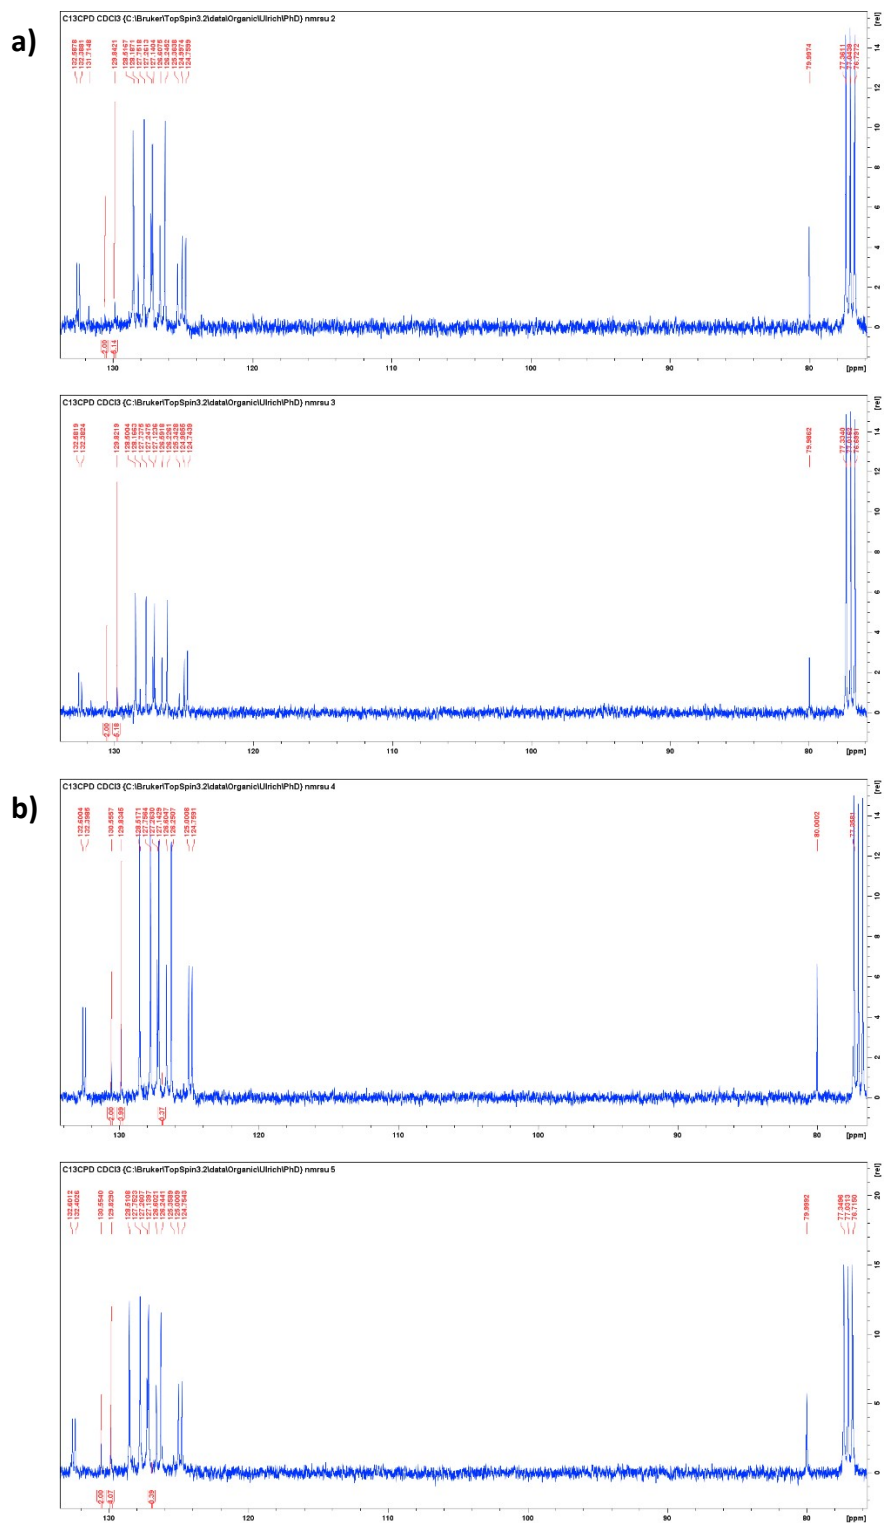

Figure S12.  $^{13}\text{C}$ -NMR spectra of the *o*-DCB/*p*-DCB (a) binary and *o*-DCB/*m*-DCB/*p*-DCB ternary mixtures with H3 guest

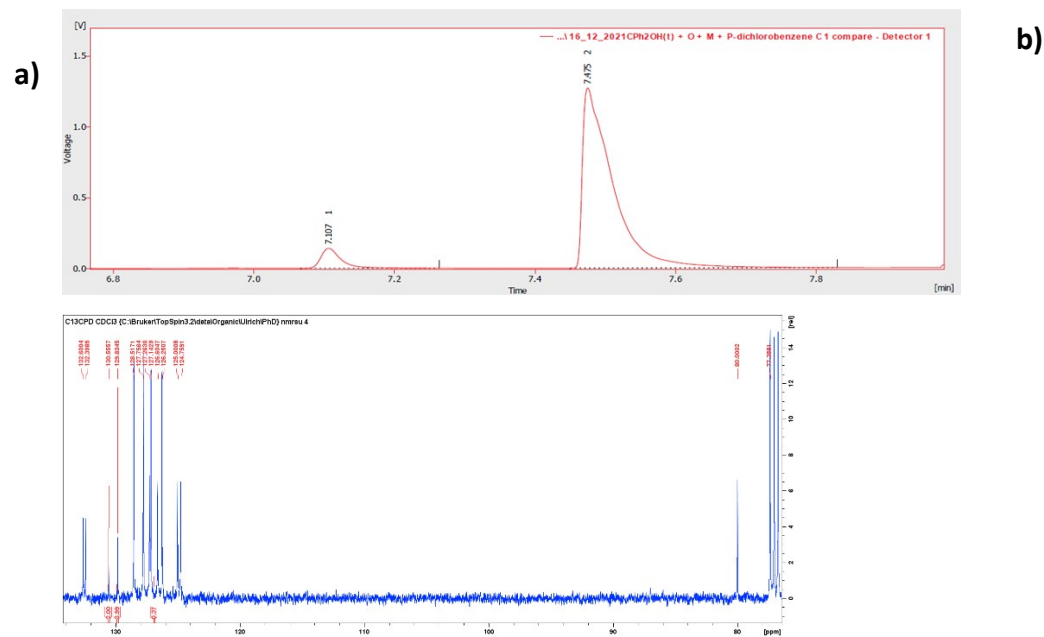

Figure S13. GC-FID chromatogram (a) and  $^{13}\text{C}$ -NMR spectrum (b) of the *o*-DCB/*m*-DCB/*p*-DCB ternary guest mixtures with H2; showing the close agreement of the obtained G:G ratios [(6.8% *m*-DCB: 93.2% *o*-DCB/*p*-DCB from GC-FID) and (6.7% *m*-DCB: 58.6% *o*-DCB: 34.7% *p*-DCB from  $^{13}\text{C}$ -NMR spectroscopy)

Table S1. Duplicate values obtained for the binary and ternary mixtures for H2 and H3, and toluene, ethylbenzene and cumene guests (H1 experiments resulted in the obtainment of vial containing only the apohost)

|               |                |                | H2           |              |             | H3           |              |             |
|---------------|----------------|----------------|--------------|--------------|-------------|--------------|--------------|-------------|
| <i>o</i> -DCB | <i>m</i> -DCB  | <i>p</i> -DCB  | Duplicate #1 | Duplicate #2 | e.s.d.s (%) | Duplicate #1 | Duplicate #2 | e.s.d.s (%) |
| X             | X <sup>b</sup> |                | 71.1:28.9    | 70.0:30.0    | (0.6)(0.6)  | 13.8:86.2    | 17.7:82.3    | (2.0)(2.0)  |
| X             |                | X <sup>c</sup> | 64.4:35.6    | 65.3:34.7    | (0.5)(0.5)  | 43.8:56.2    | 43.6:56.4    | (0.1)(0.1)  |

|   |   |                |               |               |                 |               |               |                 |
|---|---|----------------|---------------|---------------|-----------------|---------------|---------------|-----------------|
|   | X | X <sup>b</sup> | 49.3:50.7     | 49.7:50.3     | (0.2)(0.2)      | 88.8:11.2     | 91.7:8.3      | (1.5)(1.5)      |
| X | X | X <sup>c</sup> | 58.6:6.7:34.7 | 60.7:6.1:33.2 | (1.1)(0.3)(0.8) | 45.8:45.7:8.5 | 45.2:46.0:8.8 | (0.3)(0.1)(0.2) |

<sup>a</sup>Aphost was obtained, the guests were not included

<sup>b</sup>The *o*-DCB/*m*-DCB and *m*-DCB/*p*-DCB experiments were analyzed using GC-FID

<sup>c</sup>The *o*-DCB/*p*-DCB and *o*-DCB/*m*-DCB/*p*-DCB experiments were analyzed using <sup>13</sup>C-NMR spectroscopy



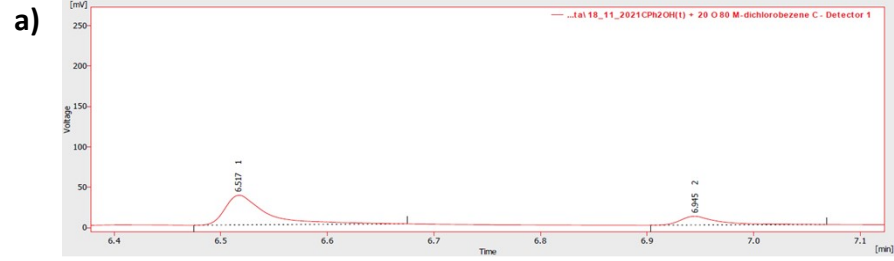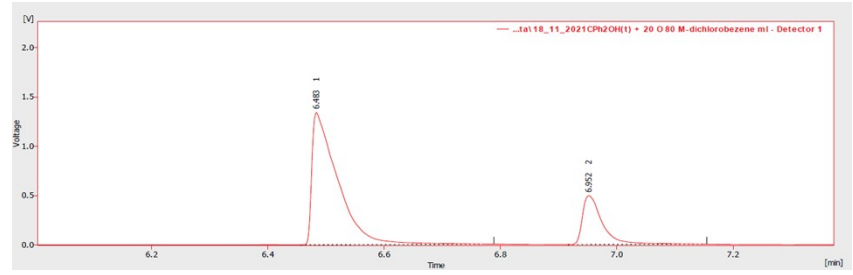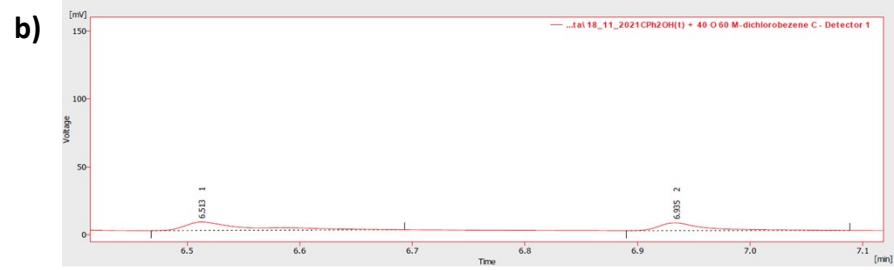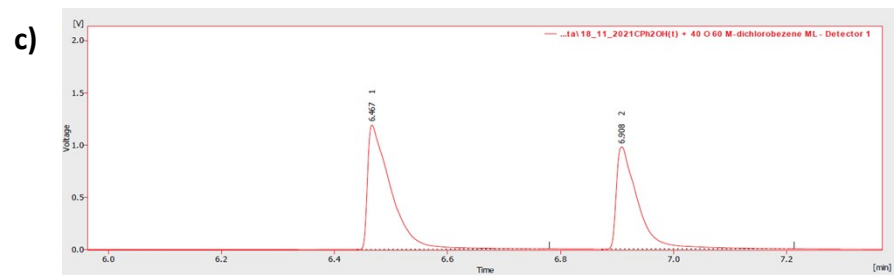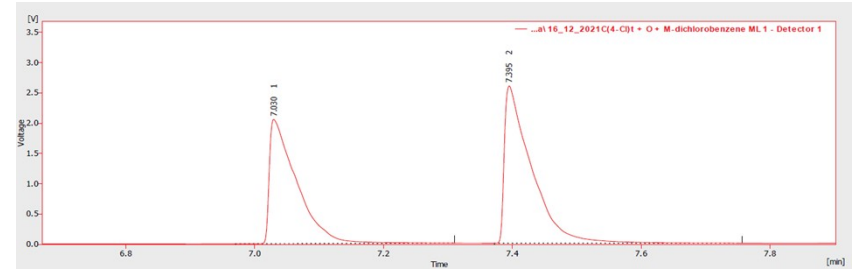

**d)**

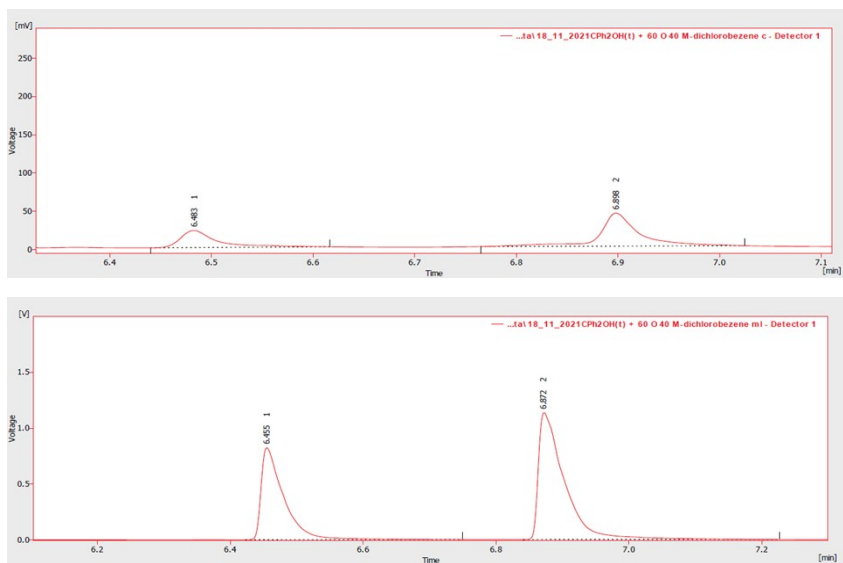

Figure S14. GC-FID chromatograms of the crystals (left) and mother liquor (right) for the 20:80 (a), 40:60 (b), 50:50 (c), and 60:40 (d) *o*-DCB/*m*-DCB binary experiments with H2

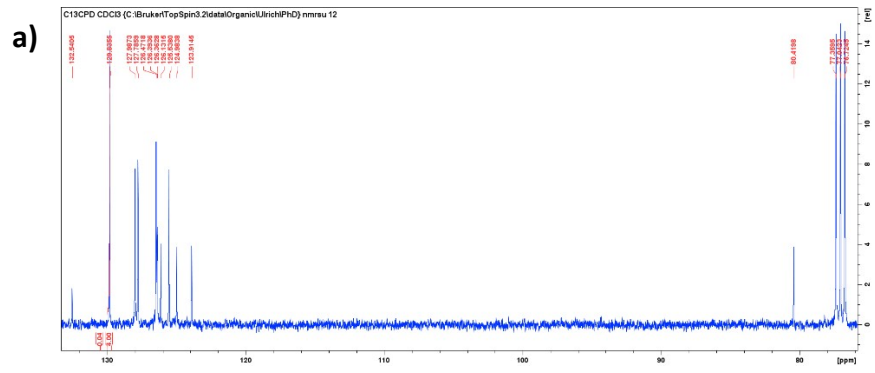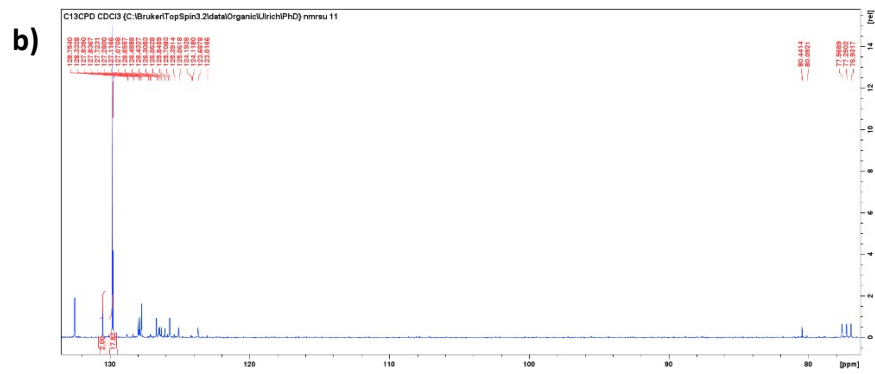

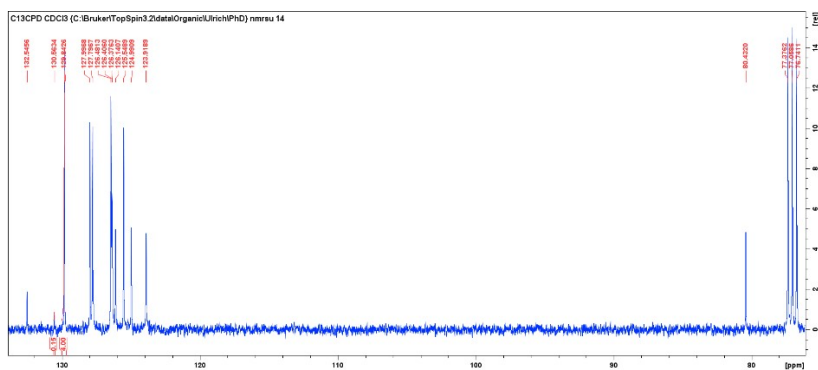

c)

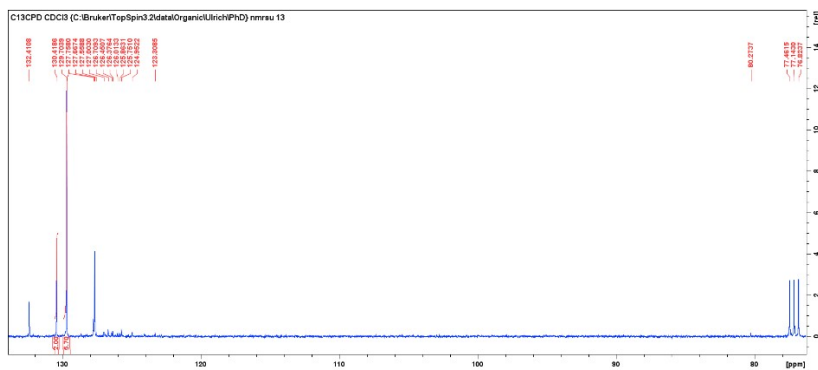

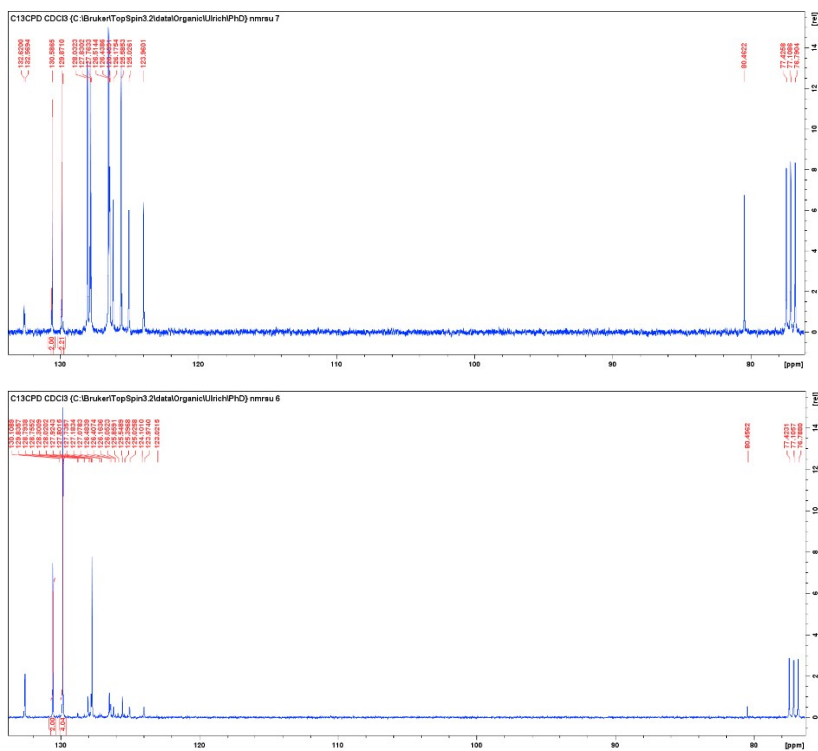

Figure S15.  $^{13}\text{C}$ -NMR spectra of the crystals (left) and mother liquor (right) for the 20:80 (a), 40:60 (b), and 50:50 (c) *o*-DCB/*p*-DCB binary experiments with H2

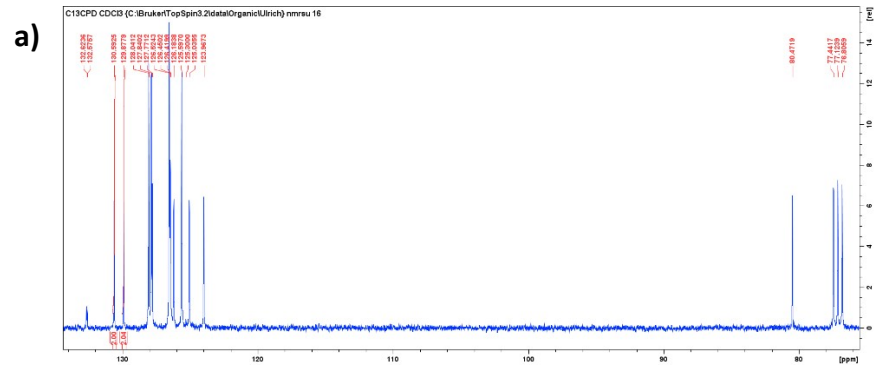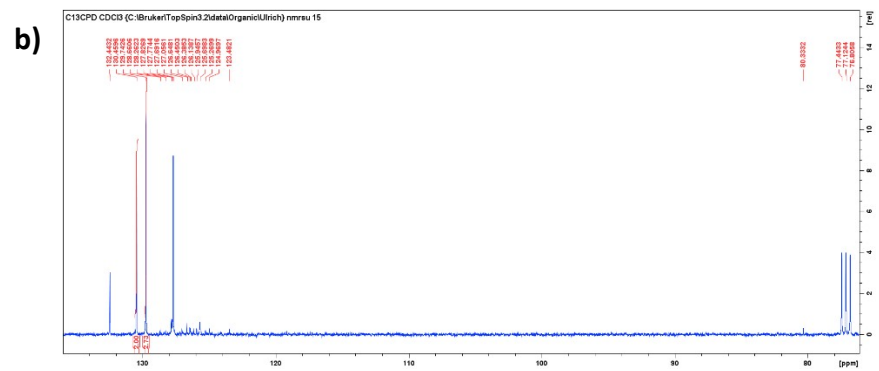

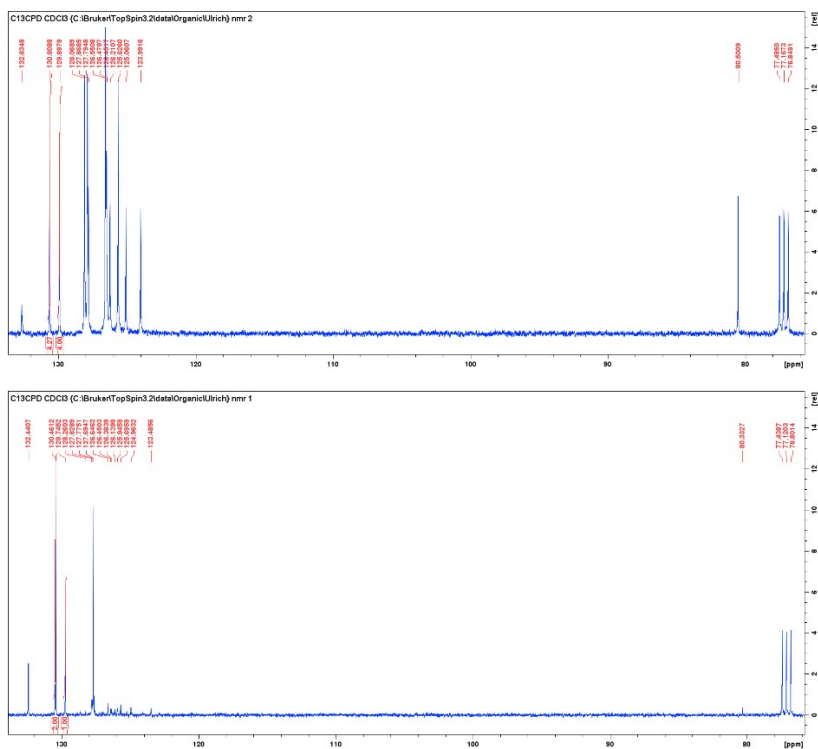

Figure S16. <sup>13</sup>C-NMR spectra of the crystals (left) and mother liquor (right) for the 60:40 (a) and 80:20 (b) *o*-DCB/*p*-DCB binary experiments with H2

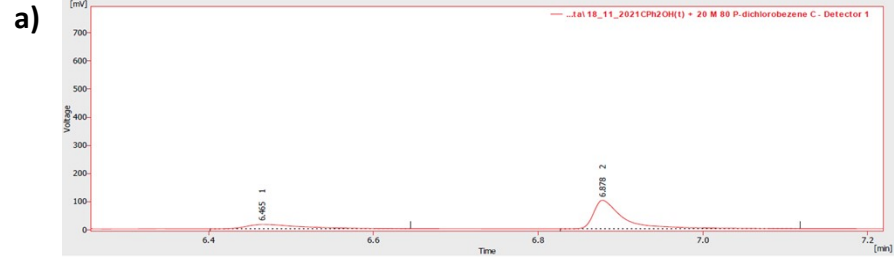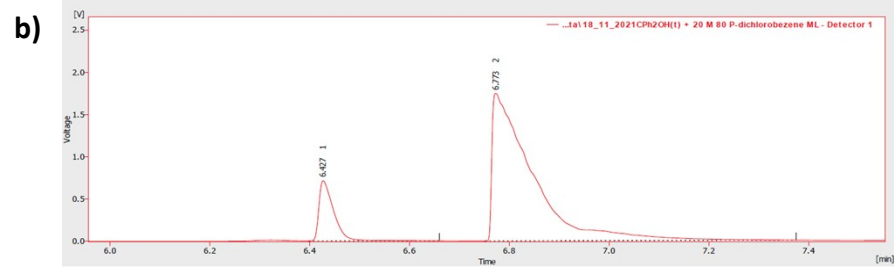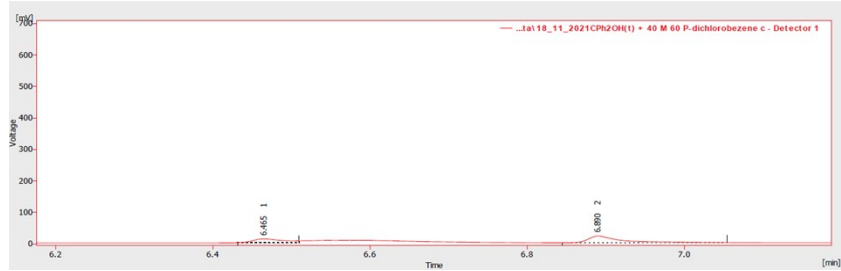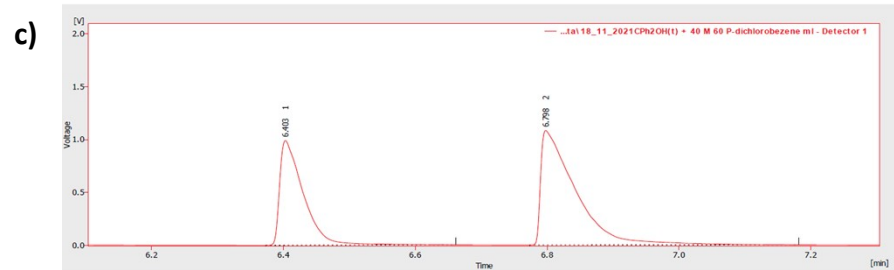



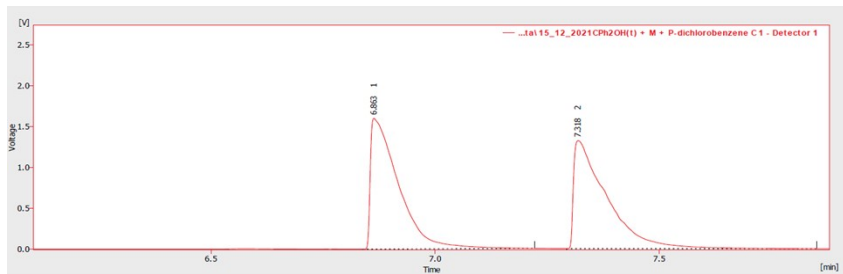

d)

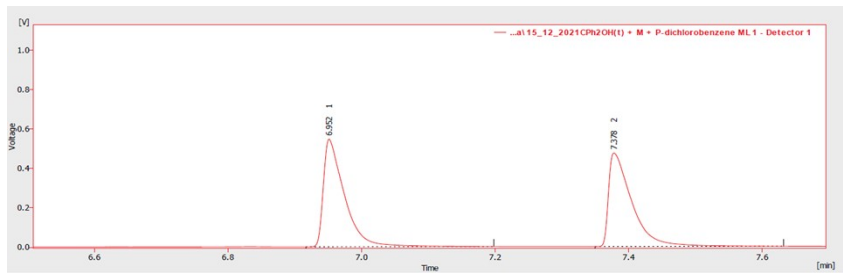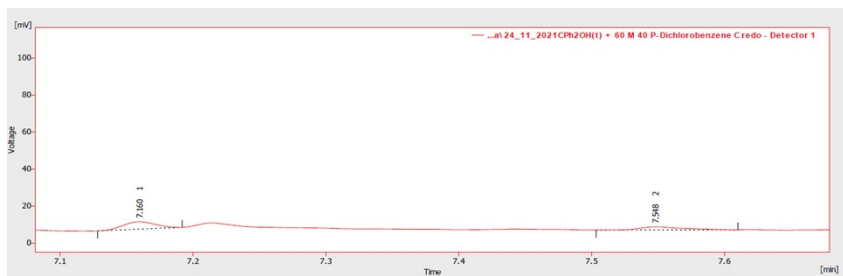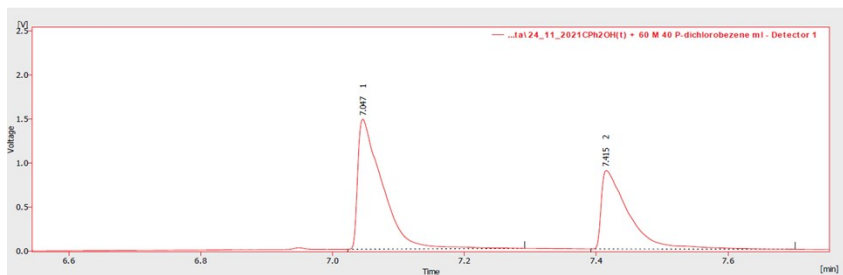

Figure S17. GC-FID chromatograms of the crystals (left) and mother liquor (right) for the 20:80 (a), 40:60 (b), 50:50 (c), and 60:40 (d) *m*-DCB/*p*-DCB binary experiments with H2

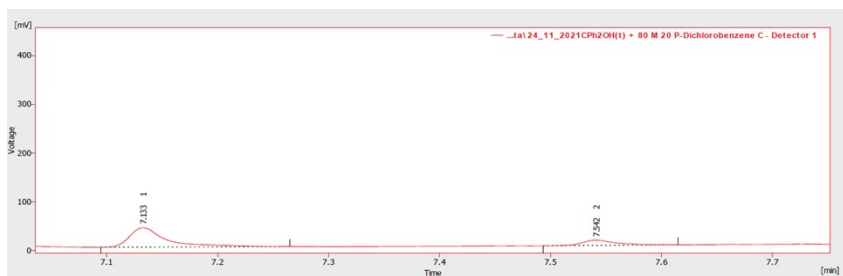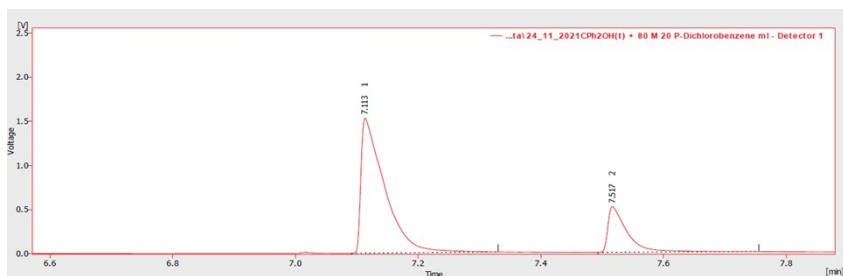

Figure S18. GC-FID chromatograms of the crystals (left) and mother liquor (right) for the 80:20 *m*-DCB/*p*-DCB binary experiments with H2

a)

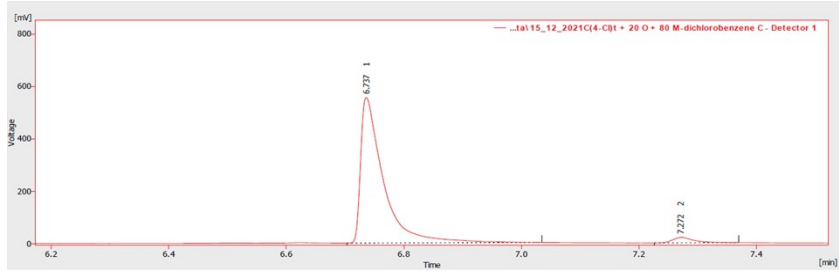

b)

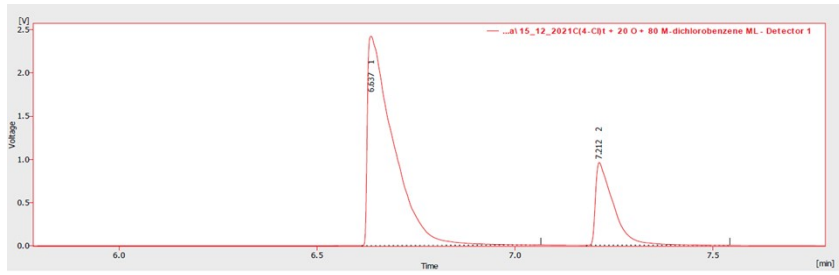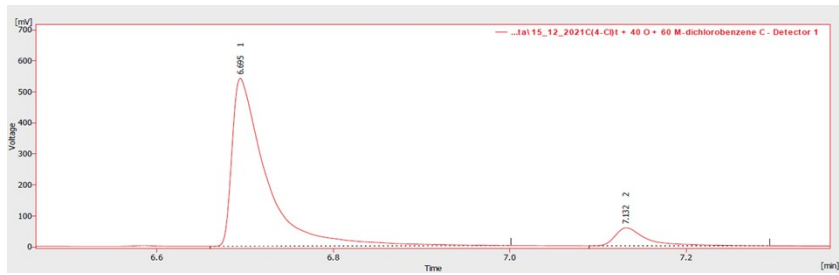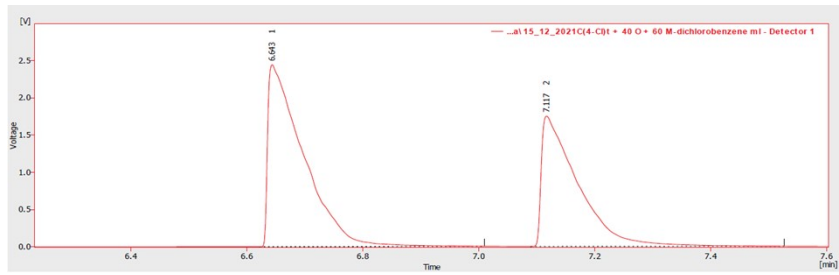

Figure S19. GC-FID chromatograms of the crystals (left) and mother liquor (right) for the 20:80 (a) and 40:60 (b) *o*-DCB/*m*-DCB binary experiments with H3

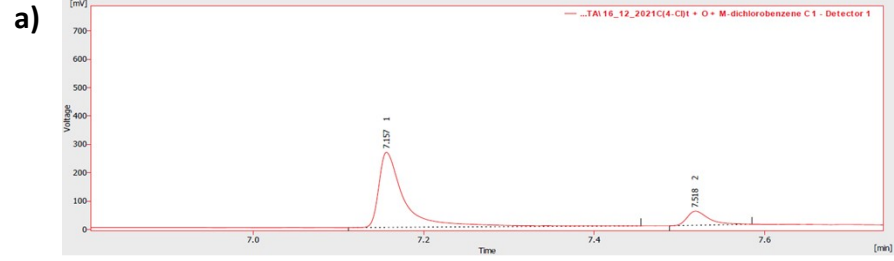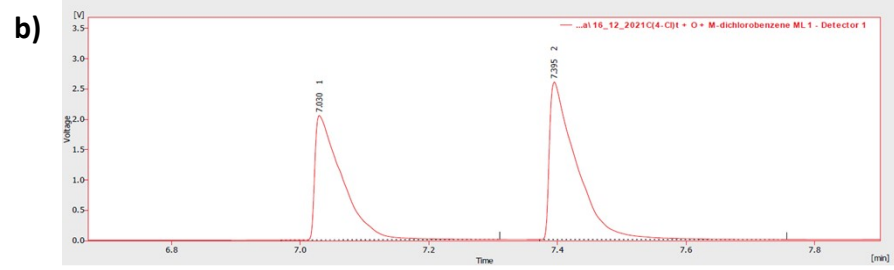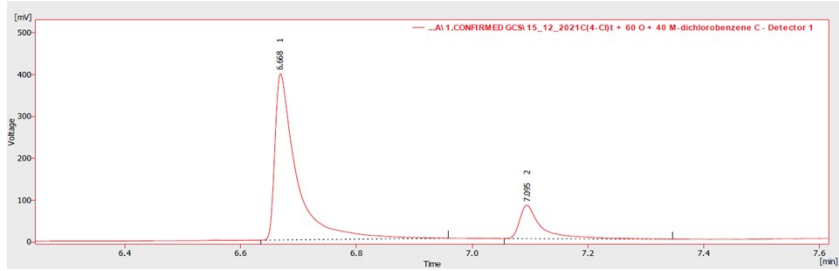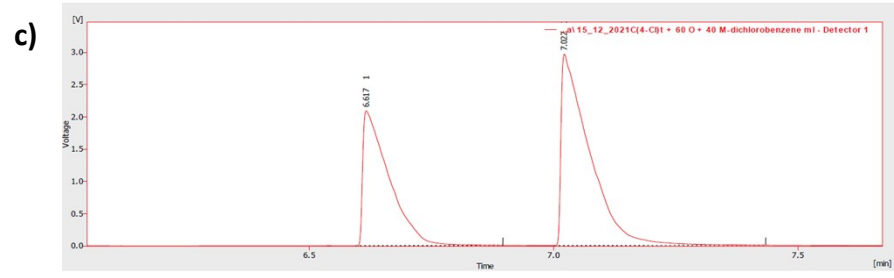

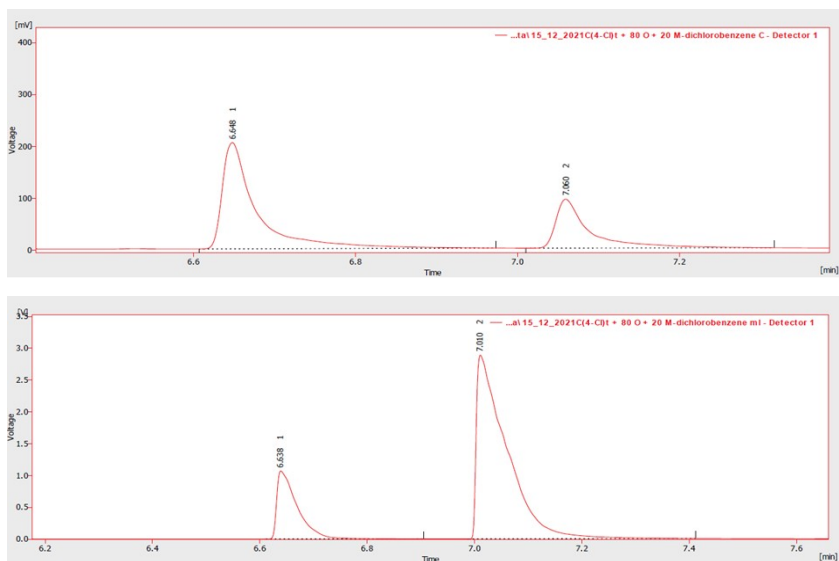

Figure S20. GC-FID chromatograms of the crystals (left) and mother liquor (right) for the 50:50 (a), 60:40 (a), and 80:20 (b) *o*-DCB/*m*-DCB binary experiments with H3

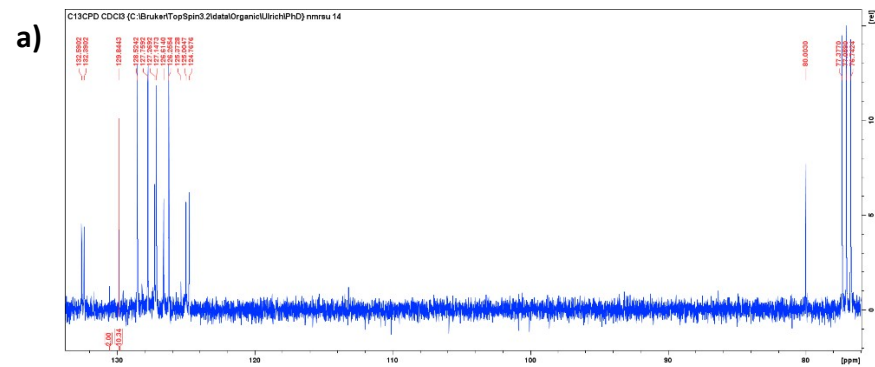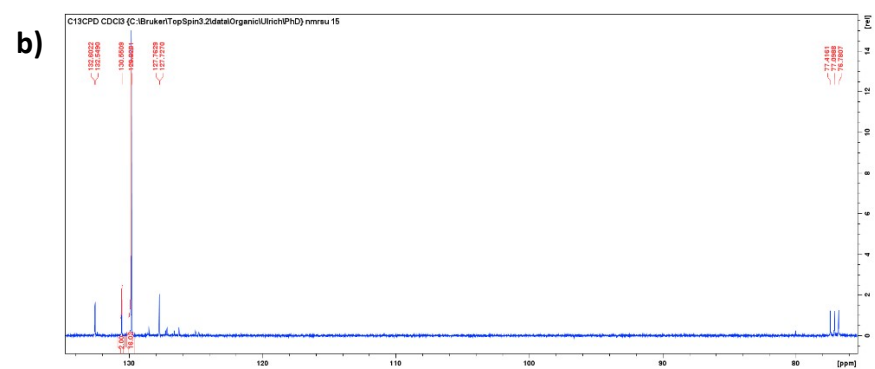





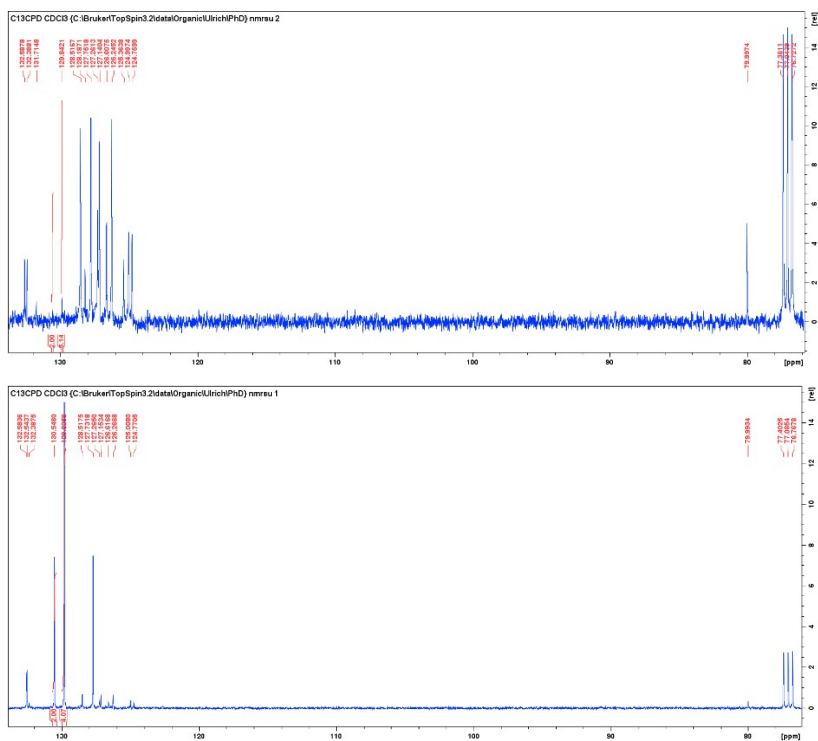

Figure S21.  $^{13}\text{C}$ -NMR spectra of the crystals (left) and mother liquor (right) for the 20:80 (a), 40:60 (b), and 50:50 (c) *o*-DCB/*p*-DCB binary experiments with H3

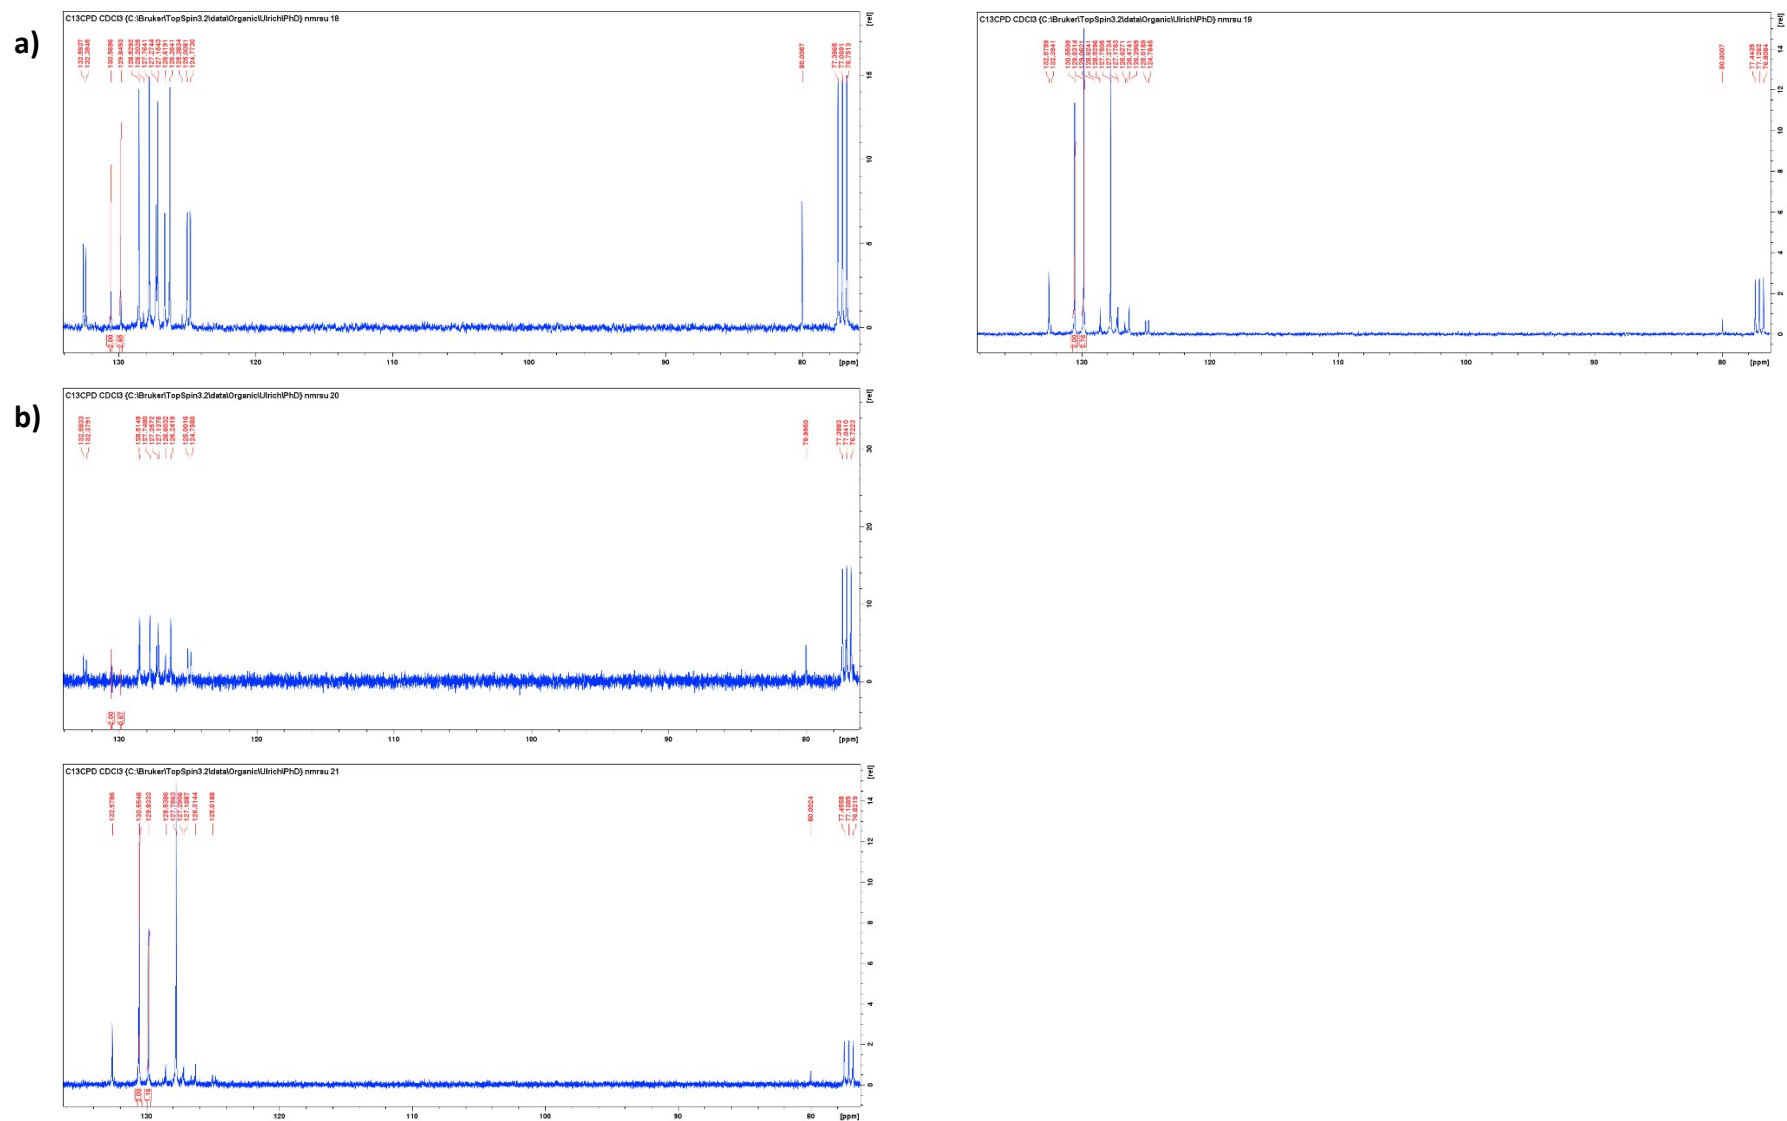

Figure S22.  $^{13}\text{C}$ -NMR spectra of the crystals (left) and mother liquor (right) for the 60:40 (a) and 80:20 (b) *o*-DCB/*p*-DCB binary experiments with H3

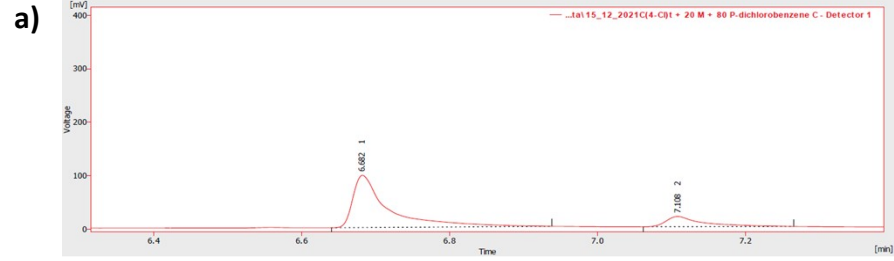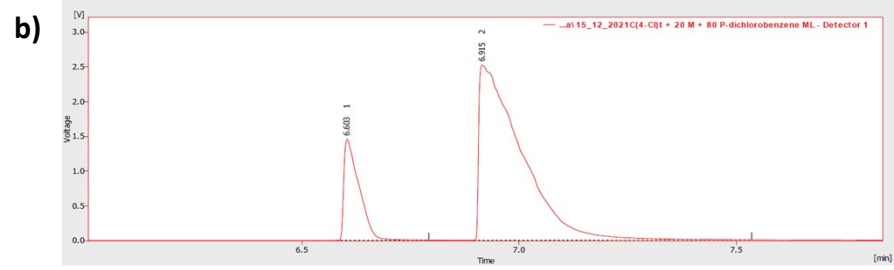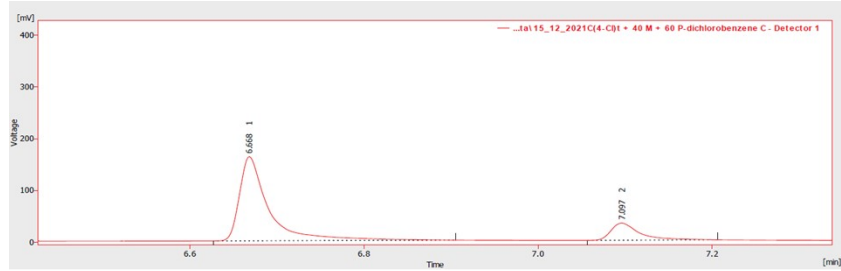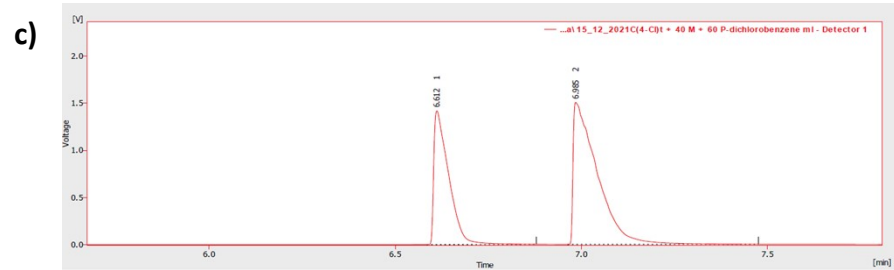

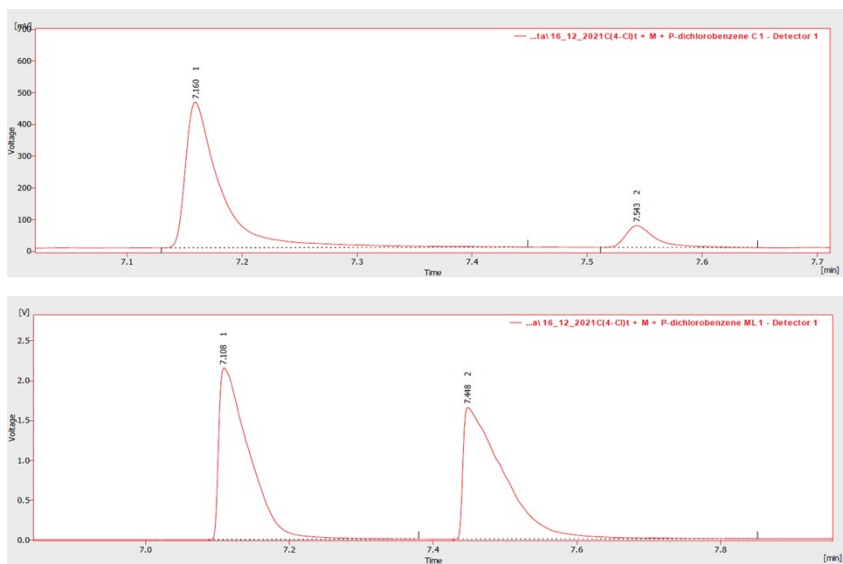

Figure S23. GC-FID chromatograms of the crystals (left) and mother liquor (right) for the 20:80 (a), 40:60 (b), and 50:50 (c) *m*-DCB/*p*-DCB binary experiments with H3

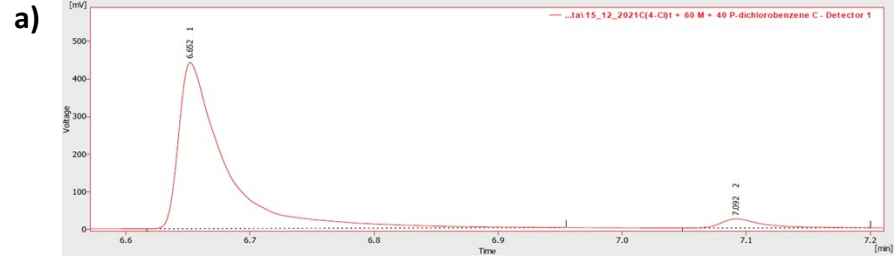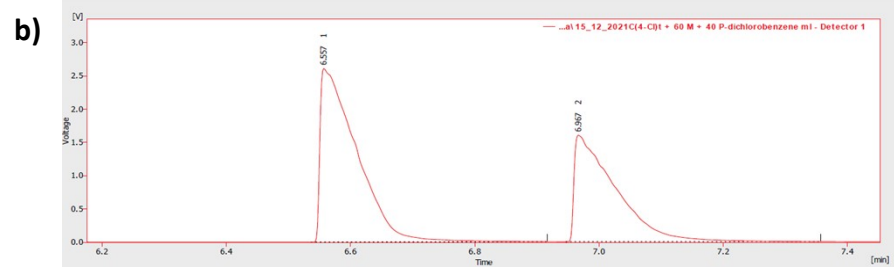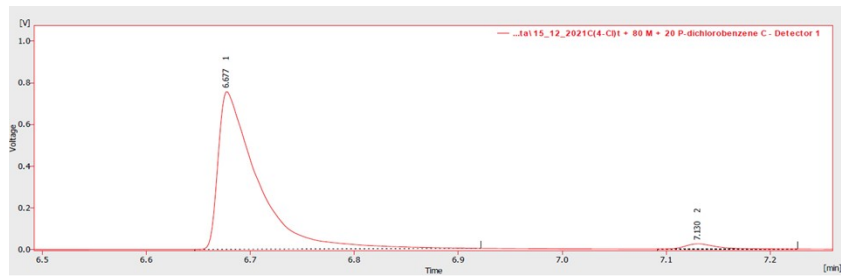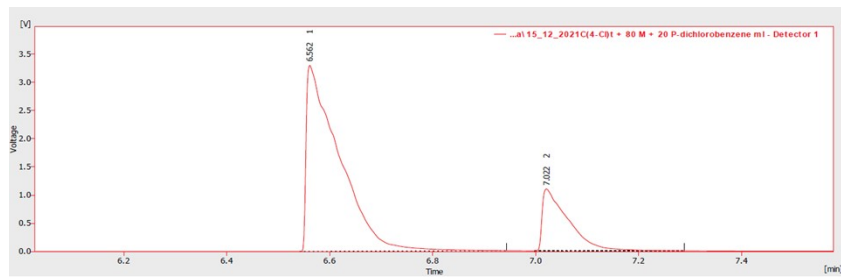

**Figure S24. GC-FID chromatograms of the crystals (left) and mother liquor (right) for the 60:40 (a) and 80:20 (b) *m*-DCB/*p*-DCB binary experiments with H3**

**Table S2. Data points obtained for the guest/guest (dichlorobenzene) mixtures with corresponding K values for H2**

| Binary mixture                     | Crystal $G_A:G_B$ | Mother liquor $G_A:G_B$ | K values |
|------------------------------------|-------------------|-------------------------|----------|
| 20:80 <i>o</i> -DCB/ <i>m</i> -DCB | 0.21:0.79         | 0.22:0.78               | 1.04     |
| 40:60 <i>o</i> -DCB/ <i>m</i> -DCB | 0.41:0.59         | 0.43:0.57               | 1.12     |
| 50:50 <i>o</i> -DCB/ <i>m</i> -DCB | 0.68:0.32         | 0.61:0.39               | 1.31     |
| 60:40 <i>o</i> -DCB/ <i>m</i> -DCB | 0.71:0.29         | 0.62:0.38               | 1.51     |
| 80:20 <i>o</i> -DCB/ <i>m</i> -DCB | <sup>a</sup>      | <sup>a</sup>            | –        |
| 20:80 <i>o</i> -DCB/ <i>p</i> -DCB | 0.02:0.98         | 0.18:0.82               | 10.98    |
| 40:60 <i>o</i> -DCB/ <i>p</i> -DCB | 0.07:0.93         | 0.41:0.59               | 9.31     |
| 50:50 <i>o</i> -DCB/ <i>p</i> -DCB | 0.64:0.36         | 0.50:0.50               | 1.82     |
| 60:40 <i>o</i> -DCB/ <i>p</i> -DCB | 0.66:0.34         | 0.59:0.41               | 1.34     |
| 80:20 <i>o</i> -DCB/ <i>p</i> -DCB | 0.68:0.32         | 0.80:0.20               | 1.87     |
| 20:80 <i>m</i> -DCB/ <i>p</i> -DCB | 0.22:0.78         | 0.13:0.87               | 1.91     |
| 40:60 <i>m</i> -DCB/ <i>p</i> -DCB | 0.36:0.64         | 0.38:0.62               | 1.11     |
| 50:50 <i>m</i> -DCB/ <i>p</i> -DCB | 0.49:0.51         | 0.49:0.51               | 1.01     |
| 60:40 <i>m</i> -DCB/ <i>p</i> -DCB | 0.62:0.38         | 0.60:0.40               | 1.10     |
| 80:20 <i>m</i> -DCB/ <i>p</i> -DCB | 0.80:0.20         | 0.79:0.21               | 1.12     |

<sup>a</sup>A gel remained in the vial



**Table S3. Data points obtained for the guest/guest (dichlorobenzene) mixtures with corresponding K values for H3**

| Binary mixture                     | Crystal $G_A:G_B$ | Mother liquor $G_A:G_B$ | K values |
|------------------------------------|-------------------|-------------------------|----------|
| 20:80 <i>o</i> -DCB/ <i>m</i> -DCB | 0.03:0.97         | 0.22:0.78               | 7.83     |
| 40:60 <i>o</i> -DCB/ <i>m</i> -DCB | 0.10:0.90         | 0.42:0.58               | 6.80     |
| 50:50 <i>o</i> -DCB/ <i>m</i> -DCB | 0.14:0.86         | 0.56:0.44               | 7.89     |
| 60:40 <i>o</i> -DCB/ <i>m</i> -DCB | 0.17:0.83         | 0.61:0.39               | 7.53     |
| 80:20 <i>o</i> -DCB/ <i>m</i> -DCB | 0.31:0.69         | 0.80:0.20               | 8.90     |
| 20:80 <i>o</i> -DCB/ <i>p</i> -DCB | 0.35:0.65         | 0.20:0.80               | 2.19     |
| 40:60 <i>o</i> -DCB/ <i>p</i> -DCB | 0.41:0.59         | 0.40:0.60               | 1.05     |
| 50:50 <i>o</i> -DCB/ <i>p</i> -DCB | 0.44:0.56         | 0.50:0.50               | 1.26     |
| 60:40 <i>o</i> -DCB/ <i>p</i> -DCB | 0.60:0.40         | 0.59:0.41               | 1.04     |
| 80:20 <i>o</i> -DCB/ <i>p</i> -DCB | 0.86:0.14         | 0.78:0.22               | 1.74     |
| 20:80 <i>m</i> -DCB/ <i>p</i> -DCB | 0.83:0.17         | 0.17:0.83               | 24.01    |
| 40:60 <i>m</i> -DCB/ <i>p</i> -DCB | 0.83:0.17         | 0.37:0.63               | 8.63     |
| 50:50 <i>m</i> -DCB/ <i>p</i> -DCB | 0.89:0.11         | 0.50:0.50               | 8.09     |
| 60:40 <i>m</i> -DCB/ <i>p</i> -DCB | 0.95:0.05         | 0.59:0.41               | 13.97    |
| 80:20 <i>m</i> -DCB/ <i>p</i> -DCB | 0.97:0.03         | 0.79:0.21               | 9.78     |



**Table S5. Host...guest and guest...guest forces for the H2-*o*-DCB, 3(H2)-*m*-DCB and H3-*m*-DCB<sup>a</sup>**

| Interactions                           | H2- <i>o</i> -DCB  | 3(H2)- <i>m</i> -DCB   | H3- <i>m</i> -DCB     | Symmetry            |
|----------------------------------------|--------------------|------------------------|-----------------------|---------------------|
| (host)π...π(guest)                     | Not significant    | Not significant        | Not significant       |                     |
| (guest)π...π(guest)                    | None               | None                   | None                  |                     |
| <b>C-H...π</b>                         | (H...Cg, X-H...Cg) | (H...Cg, X-H...Cg)     | (H...Cg, X-H...Cg)    |                     |
| (host)C-H...π(guest) <sup>b</sup>      | 2.91 Å, 145°       |                        | None                  | 1-x, 1-y, 1-z       |
| (host)C-H...π(guest) <sup>b</sup>      |                    | 2.75 Å, 160°           |                       | x, 1-y, 1-z         |
| <b>C-Cl...π</b>                        | (X...Cg, Y-X...Cg) | (X...Cg, Y-X...Cg)     | (X...Cg, Y-X...Cg)    |                     |
| (guest)C-Cl...π(host) <sup>b</sup>     | None               | None                   | 3.864(2) Å, 134.2(1)° | 1/2+x, 1-y, z       |
| <b>Short contacts</b>                  |                    |                        |                       |                     |
| (host)C-H...C-Cl(guest) <sup>b</sup>   | 2.85 Å, 146°, <    |                        |                       | x, y, z             |
| (guest)C-H...C-C(host) <sup>b</sup>    | 2.74 Å, 133°, <    |                        |                       | 1/2-x, 1/2+y, 3/2-z |
| (host)C-H...H-C(guest) <sup>b</sup>    |                    | 2.35 Å, 161°, <        |                       | x, y, z             |
| (host)C-H...C-Cl(guest) <sup>b</sup>   |                    | 2.61 Å, 154°, <<       |                       | 1-x, y, 1-z         |
| (host)C-H...Cl-C(guest) <sup>b</sup>   |                    | 2.75 Å, 155°, <<       |                       | 1-x, 1-y, z         |
| (host)C-H...C-C(guest) <sup>b</sup>    |                    | 2.84 Å, 134°, <        |                       | x, 1-y, 1-z         |
| (guest)C-H...C-C(guest) <sup>b</sup>   |                    | 2.45 Å, 154°, <<       |                       | x, 1-y, 1-z         |
| (guest)C-Cl...C-Cl(guest) <sup>b</sup> |                    | 2.51(3) Å, 156(2)°, << |                       | 1-x, y, 2-z         |
| (guest)C-Cl...C-Cl(guest) <sup>b</sup> |                    | 2.65(3) Å, 141(2)°, << |                       | x, 1-y, 2-z         |
| (guest)C-H...C-C(guest) <sup>b</sup>   |                    | 2.52 Å, 144°, <<       |                       | 1-x, y, 1-z         |
| (host)C-H...Cl(guest) <sup>b</sup>     |                    | 2.75 Å, 123°, <<       |                       | 1-x, y, 1-z         |
| (guest)C-H...H-C(guest) <sup>b</sup>   |                    |                        | 2.24 Å, 148°, <       | 3/2-x, y, 1-z       |

<sup>a</sup>< denotes contacts less than the sum of the van der Waals radii and << contacts less than this sum minus 0.2 Å

<sup>b</sup>Intermolecular interaction
